# Supplementary material for: A peptide-crosslinking approach identifies HSPA8 and PFKL as selective interactors of an actin-derived peptide containing reduced and oxidized methionine
Source: Royal Society of Chemistry journal article supplement (doi:10.1039/d2cb00183g), 2022-01-01
Supplement: d2cb00183g2.xlsx [file d2cb00183g2.xlsx]

## Sheet: raw_data
			Forward_1	Forward_2	Reversed_1	Reversed_2	Met_control	Met(O)_control
ID	description	symbol	Met(O)_L_Met_H_1	Met(O)_L_Met_H_2	Met_L_Met(O)_H_1	Met_L_Met(O)_H_2	Met_L_Met_H	Met(O)_L_Met(O)_H
P50750	CDK9 Cyclin-dependent kinase 9	CDK9	0	0	2.01	0	0	0.43
P62191	PSMC1 26S protease regulatory subunit 4	PSMC1	1.16	1.19	1.01	0.86	0.9	0.54
O75439	PMPCB Mitochondrial-processing peptidase subunit beta	PMPCB	1.05	1.53	1.9	0.84	1.7	0.59
P49368	CCT3 T-complex protein 1 subunit gamma	CCT3	1.19	1.07	1.9	1.81	1.48	0.64
P33991	MCM4 DNA replication licensing factor MCM4	MCM4	1.12	0	0	1.37	1.11	0.66
P62312	LSM6 U6 snRNA-associated Sm-like protein LSm6	LSM6	1	1.11	1.01	0.66	1.14	0.66
Q92769	HDAC2 Histone deacetylase 2	HDAC2	1.18	0	0	0.99	0	0.67
P52272	HNRNPM Heterogeneous nuclear ribonucleoprotein M	HNRNPM	2.01	2.62	0.34	0.4	0.91	0.68
Q9UI26	IPO11 Importin-11	IPO11	0	1.12	0	0	0	0.7
Q96JB2	COG3 Conserved oligomeric Golgi complex subunit 3	COG3	0	0	0	0	0	0.7
Q9Y365	STARD10 PCTP-like protein	STARD10	0.56	0.84	1.87	1.44	0.88	0.71
Q12874	SF3A3 Splicing factor 3A subunit 3	SF3A3	0.96	0	0	0	0	0.71
P50897	PPT1 Palmitoyl-protein thioesterase 1	PPT1	0.66	0.58	1.82	1.59	1	0.72
P48163	ME1 NADP-dependent malic enzyme	ME1	0.74	1.03	0	0	0	0.72
Q8TCU6	PREX1 Phosphatidylinositol 3,4,5-trisphosphate-dependent	PREX1	0.47	0.67	1.47	1.13	1.18	0.74
O43747	AP1G1 AP-1 complex subunit gamma-1	AP1G1	1.07	1	1.33	0	0	0.74
Q9Y4X5	ARIH1 E3 ubiquitin-protein ligase ARIH1	ARIH1	0	0	0	1.47	0	0.76
P61981	YWHAG 14-3-3 protein gamma	YWHAG	0	0.84	1.7	0	0	0.79
P10809	HSPD1 60 kDa heat shock protein, mitochondrial	HSPD1	0.63	0.74	1.77	1.3	1	0.8
O95994	AGR2 Anterior gradient protein 2 homolog	AGR2	0.73	0.8	1.09	0.85	1.14	0.81
Q93009	USP7 Ubiquitin carboxyl-terminal hydrolase 7	USP7	1.03	0.92	1.5	0	0	0.81
Q9UBD5	ORC3 Origin recognition complex subunit 3	ORC3	1.04	0	0	0	0	0.81
P24752	ACAT1 Acetyl-CoA acetyltransferase, mitochondrial	ACAT1	0.65	0.86	0	1.49	1.13	0.82
P19367	HK1 Hexokinase-1	HK1	1.02	1.03	1.44	1.02	1.17	0.82
Q7Z406	MYH14 Myosin-14	MYH14	1.05	1.29	1.51	1.82	1.52	0.82
O43252	PAPSS1 Bifunctional 3-phosphoadenosine 5-phosphosulfate	PAPSS1	0.88	0.9	2.23	1.51	0	0.82
Q99798	ACO2 Aconitate hydratase, mitochondrial	ACO2	0.62	0.66	2.27	2.01	0.85	0.83
P52209	PGD 6-phosphogluconate dehydrogenase, decarboxylating	PGD	0.72	0.89	1.66	1.44	0.99	0.83
P11413	G6PD Glucose-6-phosphate 1-dehydrogenase	G6PD	0.68	0.76	1.63	1.3	1	0.83
Q5JRX3	PITRM1 Presequence protease, mitochondrial	PITRM1	1.88	2.97	0.56	0.36	1.05	0.84
P45974	USP5 Ubiquitin carboxyl-terminal hydrolase 5	USP5	0.78	0.78	2.23	0	1.15	0.84
Q9P258	RCC2 Protein RCC2	RCC2	0.88	0.99	1.76	1.33	1.29	0.84
Q9Y4L1	HYOU1 Hypoxia up-regulated protein 1	HYOU1	1	1.29	1.26	0.72	1.4	0.84
Q16822	PCK2 Phosphoenolpyruvate carboxykinase	PCK2	0.81	0.92	1.57	1.13	1.02	0.85
O95340	PAPSS2 Bifunctional 3-phosphoadenosine 5-phosphosulfate	PAPSS2	0.67	0.7	2.84	1.32	1.08	0.85
P04080	CSTB Cystatin-B	CSTB	0.51	0.57	2.97	0	0	0.85
Q9UNS2	COPS3 COP9 signalosome complex subunit 3	COPS3	0	1.51	0	0	0	0.85
P00505	GOT2 Aspartate aminotransferase, mitochondrial	GOT2	1.16	1.14	1.24	0.95	1	0.86
P62333	PSMC6 26S protease regulatory subunit 10B	PSMC6	1.03	1.36	1.25	0	1.04	0.86
Q9HCC0	MCCC2 Methylcrotonoyl-CoA carboxylase beta chain, mitoch	MCCC2	0.73	0.82	1.92	1.29	1.06	0.86
Q9P2J5	LARS Leucine--tRNA ligase, cytoplasmic	LARS	1.03	1.3	1.95	1.19	1.11	0.86
Q9BV44	THUMPD3 THUMP domain-containing protein 3	THUMPD3	0	1.08	0	1.49	1.47	0.86
P80404	ABAT 4-aminobutyrate aminotransferase, mitochondrial	ABAT	0.86	1.15	1.38	1.03	0	0.86
Q01082	SPTBN1 Spectrin beta chain, non-erythrocytic 1	SPTBN1	0	1.49	0	1.03	0	0.86
P11216	PYGB Glycogen phosphorylase, brain form	PYGB	0.57	0	0	20	0	0.86
P55072	VCP Transitional endoplasmic reticulum ATPase	VCP	1	1.24	1.36	1.05	1.23	0.87
P07858	CTSB Cathepsin B	CTSB	0.65	0.72	1.72	1.23	0.99	0.88
P30084	ECHS1 Enoyl-CoA hydratase, mitochondrial	ECHS1	0.59	0.7	2.03	1.58	1.12	0.88
P09622	DLD Dihydrolipoyl dehydrogenase, mitochondrial	DLD	0.68	0.87	2.94	1.22	1.15	0.88
Q96HY7	DHTKD1 Probable 2-oxoglutarate dehydrogenase E1 component	DHTKD1	0.77	0.74	0	0	1.29	0.88
O00410	IPO5 Importin-5	IPO5	0.88	1.18	2.58	1.08	1.34	0.88
Q92841	DDX17 Probable ATP-dependent RNA helicase DDX17	DDX17	0	0	0	0	0	0.88
P38646	HSPA9 Stress-70 protein, mitochondrial	HSPA9	1.44	1.88	0.83	0.68	0.99	0.89
P48147	PREP Prolyl endopeptidase	PREP	1.33	1.8	1.16	0.77	1.16	0.89
Q04760	GLO1 Lactoylglutathione lyase	GLO1	0.84	0.95	2.22	1.43	1.24	0.89
Q9Y6Q5	AP1M2 AP-1 complex subunit mu-2	AP1M2	1.24	1.46	0	0	1.29	0.89
Q92499	DDX1 ATP-dependent RNA helicase DDX1	DDX1	0.96	1.17	1.34	0.94	0	0.89
P56192	MARS Methionine--tRNA ligase, cytoplasmic	MARS	0	0	1.62	0	0	0.89
P55809	OXCT1 Succinyl-CoA:3-ketoacid coenzyme A transferase 1,	OXCT1	0	0	2.32	0	0	0.89
Q08J23	NSUN2 tRNA (cytosine(34)-C(5))-methyltransferase	NSUN2	1.12	1.25	0	1.7	1.14	0.9
P13489	RNH1 Ribonuclease inhibitor	RNH1	0.88	0.99	1.89	1.29	1.27	0.9
P51649	ALDH5A1 Succinate-semialdehyde dehydrogenase, mitochondria	ALDH5A1	0	1.77	1.64	1.36	0	0.9
P33176	KIF5B Kinesin-1 heavy chain	KIF5B	0.64	0.68	2.08	1.56	1.02	0.91
P11586	MTHFD1 C-1-tetrahydrofolate synthase, cytoplasmic	MTHFD1	0.98	1.08	1.77	1.27	1.11	0.91
O14980	XPO1 Exportin-1	XPO1	1.02	1.05	1.7	1.32	1.15	0.91
P29401	TKT Transketolase	TKT	0.94	1.18	1.33	1.02	1.23	0.91
P16219	ACADS Short-chain specific acyl-CoA dehydrogenase, mitoc	ACADS	0.72	1.54	0	0.98	1.49	0.91
P68366	TUBA4A Tubulin alpha-4A chain	TUBA4A	1.05	1.26	1.78	0.99	1	0.92
P23396	RPS3 40S ribosomal protein S3	RPS3	0	1.28	0	1.88	0	0.92
Q14566	MCM6 DNA replication licensing factor MCM6	MCM6	1	1.02	0	1.22	1.17	0.93
O75390	CS Citrate synthase, mitochondrial	CS	1.04	1.43	1.38	0.94	1.21	0.93
P42704	LRPPRC Leucine-rich PPR motif-containing protein, mitocho	LRPPRC	0.75	1.06	1.5	0	1.34	0.93
Q14980	NUMA1 Nuclear mitotic apparatus protein 1	NUMA1	0.74	0.72	2.64	1.72	0	0.93
Q9UPN9	TRIM33 E3 ubiquitin-protein ligase TRIM33	TRIM33	0	0.85	2.18	1.47	0	0.93
P52735	VAV2 Guanine nucleotide exchange factor VAV2	VAV2	0	1.3	1.7	0	0	0.93
O60936	NOL3 Nucleolar protein 3	NOL3	0.42	0	0	0	0	0.93
Q13045	FLII Protein flightless-1 homolog	FLII	0	0	0	0	0	0.93
Q7L576	CYFIP1 Cytoplasmic FMR1-interacting protein 1	CYFIP1	1	1.03	2.02	1.59	1.01	0.94
Q99714	HSD17B10 3-hydroxyacyl-CoA dehydrogenase type-2	HSD17B10	0.76	0.98	2.1	1.37	1.05	0.94
P53396	ACLY ATP-citrate synthase	ACLY	0.69	0.84	1.73	1.57	1.1	0.94
P49902	NT5C2 Cytosolic purine 5-nucleotidase	NT5C2	0.92	1.08	0	1.51	1.32	0.94
Q92598	HSPH1 Heat shock protein 105 kDa	HSPH1	0.8	0.93	2.37	1.46	1.34	0.94
O96019	ACTL6A Actin-like protein 6A	ACTL6A	1.5	1.32	0	0	0	0.94
P56159	GFRA1 GDNF family receptor alpha-1	GFRA1	0	0.64	0	1.52	0.98	0.95
P27797	CALR Calreticulin	CALR	1.08	2	1.61	2.46	0.99	0.95
P78527	PRKDC DNA-dependent protein kinase catalytic subunit	PRKDC	1.12	1.2	1.24	1.07	1.02	0.95
Q8NDH3	NPEPL1 Probable aminopeptidase NPEPL1	NPEPL1	0.68	0.64	2.23	1.69	1.1	0.95
P54886	ALDH18A1 Delta-1-pyrroline-5-carboxylate synthase	ALDH18A1	0.84	1.04	2.01	1.44	1.14	0.95
P05783	KRT18 Keratin, type I cytoskeletal 18	KRT18	0.93	0.98	1.49	1.21	1.15	0.95
P08727	KRT19 Keratin, type I cytoskeletal 19	KRT19	0.91	0.99	1.67	1.35	1.15	0.95
P05787	KRT8 Keratin, type II cytoskeletal 8	KRT8	0.82	0.94	1.52	1.22	1.16	0.95
Q9NSE4	IARS2 Isoleucine--tRNA ligase, mitochondrial	IARS2	1.01	1.18	1.18	1	1.16	0.95
P48735	IDH2 Isocitrate dehydrogenase	IDH2	0.91	1.2	1.71	1.09	1.17	0.95
P63104	YWHAZ 14-3-3 protein zeta/delta	YWHAZ	0.93	1.05	1.83	0	1.26	0.95
P35579	MYH9 Myosin-9	MYH9	1.1	1.25	1.83	1.11	1.31	0.95
Q15233	NONO Non-POU domain-containing octamer-binding protein	NONO	0	1.26	0	0	0	0.95
P26599	PTBP1 Polypyrimidine tract-binding protein 1	PTBP1	0.84	0	2.29	2.06	1.25	0.96
P40926	MDH2 Malate dehydrogenase, mitochondrial	MDH2	1.08	1.1	1.08	1.01	1.32	0.96
Q13263	TRIM28 Transcription intermediary factor 1-beta	TRIM28	0.82	1.02	1.6	1.4	1.4	0.96
P31948	STIP1 Stress-induced-phosphoprotein 1	STIP1	1.19	1.14	1.48	1.14	1.48	0.96
Q6P2Q9	PRPF8 Pre-mRNA-processing-splicing factor 8	PRPF8	1.04	1.14	0.93	1.14	1.7	0.96
P61247	RPS3A 40S ribosomal protein S3a	RPS3A	0	0.76	1.71	1.8	0	0.96
P62280	RPS11 40S ribosomal protein S11	RPS11	0.84	0.9	0	1.31	0	0.96
P17812	CTPS1 CTP synthase 1	CTPS1	0	1.29	1.51	0	0	0.96
Q3LXA3	DAK Bifunctional ATP-dependent dihydroxyacetone kinase	DAK	0.72	0.88	1.75	1.48	0	0.97
P10155	TROVE2 60 kDa SS-A/Ro ribonucleoprotein	TROVE2	1.16	1.19	0	1.26	0	0.97
P50454	SERPINH1 Serpin H1	SERPINH1	0.71	1.09	0	1.13	1.06	0.98
P11021	HSPA5 78 kDa glucose-regulated protein	HSPA5	1.9	2.44	0.87	0.52	1.12	0.98
P33992	MCM5 DNA replication licensing factor MCM5	MCM5	1.12	1.36	1.51	0.98	1.36	0.99
P12268	IMPDH2 Inosine-5-monophosphate dehydrogenase 2	IMPDH2	0	0.7	3.28	2.3	1.39	0.99
P08243	ASNS Asparagine synthetase	ASNS	1.22	0.89	1.6	0	1.94	0.99
Q15393	SF3B3 Splicing factor 3B subunit 3	SF3B3	0.89	0.89	1.95	1.42	1.11	1
Q01813	PFKP 6-phosphofructokinase type C	PFKP	0.66	0.93	1.76	1.4	1.25	1
P08107	HSPA1B Heat shock 70 kDa protein 1A/1B	HSPA1B	10.13	14.94	0.21	0.16	1.28	1
E9PPU0	EPPK1 Epiplakin	EPPK1	1.1	0.96	1.42	0.97	1.35	1
Q14697	GANAB Neutral alpha-glucosidase AB	GANAB	1.5	1.65	1.17	0.94	1.38	1
Q14974	KPNB1 Importin subunit beta-1	KPNB1	0.98	1.16	1.77	1.32	1.42	1
Q9H3U1	UNC45A Protein unc-45 homolog A	UNC45A	0.9	1.26	0	0	0	1
P17858	PFKL 6-phosphofructokinase, liver type	PFKL	0.2	0.5	9.96	4.09	1.13	1.01
O00203	AP3B1 AP-3 complex subunit beta-1	AP3B1	0	0	0	1.61	1.13	1.01
P53597	SUCLG1 Succinyl-CoA ligase	SUCLG1	0.7	0.93	2.19	1.27	1.23	1.01
O75083	WDR1 WD repeat-containing protein 1	WDR1	0.89	0.98	1.9	1.38	1.64	1.01
Q7Z6Z7	HUWE1 E3 ubiquitin-protein ligase HUWE1	HUWE1	0.96	1.15	3.06	1.21	1.83	1.01
P14866	HNRNPL Heterogeneous nuclear ribonucleoprotein L	HNRNPL	0.81	0	0	1.15	0	1.01
Q9Y5P6	GMPPB Mannose-1-phosphate guanyltransferase beta	GMPPB	0	0	0	0	0	1.01
Q9Y678	COPG1 Coatomer subunit gamma-1	COPG1	1.08	1.46	1.63	1.08	1.23	1.02
P14625	HSP90B1 Endoplasmin	HSP90B1	0.96	1.27	1.5	1.22	1.25	1.02
P53618	COPB1 Coatomer subunit beta	COPB1	0.9	1.33	1.85	1.14	1.26	1.02
Q96T76	MMS19 MMS19 nucleotide excision repair protein homolog	MMS19	1.52	1.3	1.83	1.46	1.27	1.02
Q96QK1	VPS35 Vacuolar protein sorting-associated protein 35	VPS35	1.14	1.13	1.64	1.64	1.3	1.02
P49411	TUFM Elongation factor Tu, mitochondrial	TUFM	0.98	1.15	2.08	1.37	1.34	1.02
P31150	GDI1 Rab GDP dissociation inhibitor alpha	GDI1	1.09	0	0	0	4.35	1.02
Q9BW27	NUP85 Nuclear pore complex protein Nup85	NUP85	0.48	0	0	0	0	1.02
Q07666	KHDRBS1 KH domain-containing, RNA-binding, signal transduc	KHDRBS1	0	0	0	0	0	1.02
O14744	PRMT5 Protein arginine N-methyltransferase 5	PRMT5	1.04	1.09	2.47	1.75	1.28	1.03
P08238	HSP90AB1 Heat shock protein HSP 90-beta	HSP90AB1	1.21	1.41	1.56	1.19	1.31	1.03
P07900	HSP90AA1 Heat shock protein HSP 90-alpha	HSP90AA1	1.1	1.21	1.64	1.37	1.4	1.03
P00492	HPRT1 Hypoxanthine-guanine phosphoribosyltransferase	HPRT1	0.94	1.05	2.16	1.58	1.41	1.03
Q9UJ70	NAGK N-acetyl-D-glucosamine kinase	NAGK	0.44	0	3.52	2.63	1.02	1.04
Q92616	GCN1L1 Translational activator GCN1	GCN1L1	1.17	1.52	1.84	1.37	1.25	1.04
O95352	ATG7 Ubiquitin-like modifier-activating enzyme ATG7	ATG7	0.91	1.05	2.47	1.49	1.33	1.04
P55060	CSE1L Exportin-2	CSE1L	0.98	1.2	1.98	1.21	1.34	1.04
P34932	HSPA4 Heat shock 70 kDa protein 4	HSPA4	10.6	1.24	1.68	1.36	1.34	1.04
P47897	QARS Glutamine--tRNA ligase	QARS	1.09	1.16	1.3	1.52	1.39	1.04
Q16836	HADH Hydroxyacyl-coenzyme A dehydrogenase, mitochondria	HADH	0.96	1.38	2.42	1.26	1.39	1.04
P60709	ACTB Actin, cytoplasmic 1	ACTB	0.99	1.23	1.89	1.19	1.4	1.04
O43795	MYO1B Unconventional myosin-Ib	MYO1B	0.82	1.19	1.66	0	0	1.04
P40939	HADHA Trifunctional enzyme subunit alpha, mitochondrial	HADHA	1.35	1.72	1.02	0.72	0	1.04
Q9H4A4	RNPEP Aminopeptidase B	RNPEP	0.97	0.91	0	0	1.23	1.05
Q08211	DHX9 ATP-dependent RNA helicase A	DHX9	1.07	1.23	1.57	1.08	1.35	1.05
O60701	UGDH UDP-glucose 6-dehydrogenase	UGDH	1.02	1.07	1.7	1.31	1.4	1.05
P40763	STAT3 Signal transducer and activator of transcription 3	STAT3	0.64	0.56	2.05	1.59	0	1.05
O15371	EIF3D Eukaryotic translation initiation factor 3 subunit	EIF3D	0.74	1.09	0	0	0	1.05
P12956	XRCC6 X-ray repair cross-complementing protein 6	XRCC6	1.36	1.6	0	0	0	1.05
P06576	ATP5B ATP synthase subunit beta, mitochondrial	ATP5B	1.04	1.31	1.63	0.98	1.28	1.06
Q06323	PSME1 Proteasome activator complex subunit 1	PSME1	0.54	0.75	3.01	1.78	1.3	1.06
Q15149	PLEC Plectin	PLEC	0.96	0.96	1.62	1.21	1.33	1.06
P06744	GPI Glucose-6-phosphate isomerase	GPI	1.27	1.51	1.13	1.02	1.36	1.06
Q15185	PTGES3 Prostaglandin E synthase 3	PTGES3	0.9	1.08	1.26	1.09	1.39	1.06
O75643	SNRNP200 U5 small nuclear ribonucleoprotein 200 kDa helicas	SNRNP200	0.78	1.31	1.59	1.09	1.4	1.06
P46782	RPS5 40S ribosomal protein S5	RPS5	0.95	0	1.58	0.98	1.4	1.06
P07741	APRT Adenine phosphoribosyltransferase	APRT	0	1.51	0	1.07	1.56	1.06
O60610	DIAPH1 Protein diaphanous homolog 1	DIAPH1	0	1.34	0	0	0	1.06
P60981	DSTN Destrin	DSTN	0.93	1.11	2.4	1.67	1.4	1.07
Q27J81	INF2 Inverted formin-2	INF2	0.94	1.01	2.35	1.3	0	1.07
Q10567	AP1B1 AP-1 complex subunit beta-1	AP1B1	0.99	1.27	1.66	1.33	0	1.07
P49736	MCM2 DNA replication licensing factor MCM2	MCM2	0	1.16	1.57	0	1.12	1.08
P55786	NPEPPS Puromycin-sensitive aminopeptidase	NPEPPS	1.5	1.5	1.23	1.03	1.15	1.08
P46940	IQGAP1 Ras GTPase-activating-like protein IQGAP1	IQGAP1	1.11	1.14	1.85	1.39	1.22	1.08
Q13509	TUBB3 Tubulin beta-3 chain	TUBB3	0.85	1.56	1.11	0.92	1.22	1.08
P07737	PFN1 Profilin-1	PFN1	1.36	1.37	1.25	1.11	1.43	1.08
P31939	ATIC Bifunctional purine biosynthesis protein PURH	ATIC	1.25	1.29	1.68	1.12	1.48	1.08
P49327	FASN Fatty acid synthase	FASN	1	1.15	2.14	1.56	1.41	1.09
P13639	EEF2 Elongation factor 2	EEF2	0.98	0.94	2.2	1.57	1.47	1.09
P26639	TARS Threonine--tRNA ligase, cytoplasmic	TARS	10.55	1.23	1.83	1.14	1.26	1.1
Q14204	DYNC1H1 Cytoplasmic dynein 1 heavy chain 1	DYNC1H1	1.31	1.51	1.49	1.11	1.27	1.1
Q00610	CLTC Clathrin heavy chain 1	CLTC	1.14	1.15	1.41	1.26	1.33	1.1
O15327	INPP4B Type II inositol 3,4-bisphosphate 4-phosphatase	INPP4B	0.81	0.96	2.38	2.09	1.39	1.1
P09467	FBP1 Fructose-1,6-bisphosphatase 1	FBP1	1.38	1.53	1.78	1.23	2.08	1.1
O43488	AKR7A2 Aflatoxin B1 aldehyde reductase member 2	AKR7A2	1.18	0	1.16	0	0	1.1
P41252	IARS Isoleucine--tRNA ligase, cytoplasmic	IARS	0.94	1.18	1.3	0.92	1.11	1.11
P07384	CAPN1 Calpain-1 catalytic subunit	CAPN1	1.17	1.4	1.23	0	1.13	1.11
P04406	GAPDH Glyceraldehyde-3-phosphate dehydrogenase	GAPDH	0.9	1.17	1.89	1.42	1.36	1.11
Q00839	HNRNPU Heterogeneous nuclear ribonucleoprotein U	HNRNPU	1.01	1.56	2.4	2.21	1.65	1.11
Q9H845	ACAD9 Acyl-CoA dehydrogenase family member 9, mitochondr	ACAD9	0.62	0.62	1.33	0.9	0	1.11
Q9Y490	TLN1 Talin-1	TLN1	0	1.2	1.9	2.29	0	1.11
P31949	S100A11 Protein S100-A11	S100A11	1.02	1.2	1.31	0.97	1.13	1.12
P53621	COPA Coatomer subunit alpha	COPA	1.24	1.48	1.59	1.33	1.15	1.12
P68104	EEF1A1 Elongation factor 1-alpha 1	EEF1A1	0.72	0.84	2.68	2.02	1.23	1.12
P21333	FLNA Filamin-A	FLNA	1.13	1.11	1.55	1.26	1.29	1.12
Q8IZ83	ALDH16A1 Aldehyde dehydrogenase family 16 member A1	ALDH16A1	1.19	1.04	2.42	1.21	1.36	1.12
P54136	RARS Arginine--tRNA ligase, cytoplasmic	RARS	1.12	1.23	2.02	1.54	1.42	1.12
P14618	PKM Pyruvate kinase isozymes M1/M2	PKM	1.17	1.17	1.64	1.35	1.46	1.12
P62937	PPIA Peptidyl-prolyl cis-trans isomerase A	PPIA	1.12	1.22	1.77	1.59	1.47	1.12
P55263	ADK Adenosine kinase	ADK	1.74	1.68	1.29	1	1.5	1.12
O00764	PDXK Pyridoxal kinase	PDXK	0.86	1.05	2.7	1.21	1.6	1.12
P08237	PFKM 6-phosphofructokinase, muscle type	PFKM	0	0.62	0	0	0	1.12
Q12931	TRAP1 Heat shock protein 75 kDa, mitochondrial	TRAP1	1.05	1.13	1.56	1.02	0	1.12
Q5VYK3	ECM29 Proteasome-associated protein ECM29 homolog	ECM29	7.73	1.13	2.99	8.82	0	1.12
O43175	PHGDH D-3-phosphoglycerate dehydrogenase	PHGDH	0.63	1.37	2.34	0	0	1.12
Q9NZT2	OGFR Opioid growth factor receptor	OGFR	0	0	2.26	0	0	1.12
B0V043	VARS Valyl-tRNA synthetase	VARS	1.24	1.28	0	1.16	1.1	1.13
P07237	P4HB Protein disulfide-isomerase	P4HB	1.3	1.77	1.95	1.08	1.21	1.13
Q15366	PCBP2 Poly(rC)-binding protein 2	PCBP2	0	0.76	0	0	0	1.13
P30153	PPP2R1A Serine/threonine-protein phosphatase 2A 65 kDa reg	PPP2R1A	1.02	1.24	1.73	1.55	1.23	1.14
Q9ULA0	DNPEP Aspartyl aminopeptidase	DNPEP	0.73	1.05	3.02	1.57	1.28	1.14
O75369	FLNB Filamin-B	FLNB	1.24	1.04	1.48	1.41	1.4	1.14
Q9H993	C6orf211 UPF0364 protein C6orf211	C6orf211	1.4	1.7	1.52	1.27	1.46	1.14
P61978	HNRNPK Heterogeneous nuclear ribonucleoprotein K	HNRNPK	0.98	1.06	1.94	0	1.33	1.15
P33993	MCM7 DNA replication licensing factor MCM7	MCM7	1.42	1.59	1.36	1.02	1.33	1.15
Q86VP6	CAND1 Cullin-associated NEDD8-dissociated protein 1	CAND1	1.06	1.22	1.84	1.21	1.36	1.15
Q71U36	TUBA1A Tubulin alpha-1A chain	TUBA1A	1.12	1.53	2.11	0	1.43	1.15
Q9UHD8	SEPT9 Septin-9	SEPT9	0	1.04	2.24	0	0	1.15
P06748	NPM1 Nucleophosmin	NPM1	1.06	1.53	1.84	1.7	0	1.15
Q9BUF5	TUBB6 Tubulin beta-6 chain	TUBB6	1.45	1.38	1.3	0.96	1.17	1.16
Q9HAV4	XPO5 Exportin-5	XPO5	1.07	1.28	1.73	1.27	1.18	1.16
Q15365	PCBP1 Poly(rC)-binding protein 1	PCBP1	0.56	0.92	3.7	2.43	1.32	1.16
Q9ULV4	CORO1C Coronin-1C	CORO1C	1.01	10.65	0	1.24	1.42	1.16
O43592	XPOT Exportin-T	XPOT	1.22	1.13	1.83	0	3.26	1.16
Q15084	PDIA6 Protein disulfide-isomerase A6	PDIA6	1.17	1.24	2.61	0	10.71	1.16
P02533	KRT14 Keratin, type I cytoskeletal 14	KRT14	20	20	1.84	20	0	1.16
P41250	GARS Glycine--tRNA ligase	GARS	1.06	1.04	1.55	1.41	1.23	1.17
P49588	AARS Alanine--tRNA ligase, cytoplasmic	AARS	1.16	1.29	1.5	1.06	1.25	1.17
Q9Y265	RUVBL1 RuvB-like 1	RUVBL1	0.86	0.95	2.02	0.97	1.3	1.17
P05165	PCCA Propionyl-CoA carboxylase alpha chain, mitochondri	PCCA	1.33	1.24	1.06	1.08	1.36	1.17
P13804	ETFA Electron transfer flavoprotein subunit alpha, mito	ETFA	0.88	1.36	2.8	1.51	1.36	1.17
P30837	ALDH1B1 Aldehyde dehydrogenase X, mitochondrial	ALDH1B1	1.06	1.09	1.4	0	1.54	1.17
Q96P70	IPO9 Importin-9	IPO9	1.15	1.61	3.37	0	0	1.17
Q96CN7	ISOC1 Isochorismatase domain-containing protein 1	ISOC1	1.64	1.7	1.36	0	1.14	1.18
Q06830	PRDX1 Peroxiredoxin-1	PRDX1	0.86	1.08	2.02	2.22	1.25	1.18
P46781	RPS9 40S ribosomal protein S9	RPS9	1.11	1.15	0	0	1.34	1.18
P22234	PAICS Multifunctional protein ADE2	PAICS	1.14	1.1	1.96	1.88	1.5	1.18
O75533	SF3B1 Splicing factor 3B subunit 1	SF3B1	1.16	1.36	1.14	10.57	0	1.18
P27708	CAD CAD protein	CAD	1.25	1.42	10.69	1.27	1.44	1.19
Q12905	ILF2 Interleukin enhancer-binding factor 2	ILF2	0	0	0	0	0	1.19
Q92900	UPF1 Regulator of nonsense transcripts 1	UPF1	1.17	1.16	0	1.27	1.06	1.2
P61158	ACTR3 Actin-related protein 3	ACTR3	1.35	0.98	1.92	1.2	1.27	1.2
P27348	YWHAQ 14-3-3 protein theta	YWHAQ	0.97	1.65	1.76	0	20	1.2
Q9Y5L0	TNPO3 Transportin-3	TNPO3	1.39	1.02	1.34	0	0	1.2
Q9BXW7	CECR5 Cat eye syndrome critical region protein 5	CECR5	1.11	1.64	0	0.88	0.97	1.21
P28838	LAP3 Cytosol aminopeptidase	LAP3	0.96	1.1	1.38	1.33	1.07	1.21
Q9BR76	CORO1B Coronin-1B	CORO1B	0.97	8.89	1.9	1.29	1.28	1.21
Q9BSJ8	ESYT1 Extended synaptotagmin-1	ESYT1	0.99	1.45	2.53	1.81	1.37	1.21
Q05639	EEF1A2 Elongation factor 1-alpha 2	EEF1A2	0.99	1.08	2.31	2.05	1.58	1.21
P04792	HSPB1 Heat shock protein beta-1	HSPB1	1.45	1.96	1.58	1.48	1.63	1.21
P15880	RPS2 40S ribosomal protein S2	RPS2	1.11	1.03	1.72	1.29	1.26	1.22
Q6XQN6	NAPRT1 Nicotinate phosphoribosyltransferase	NAPRT1	0.9	1.34	2.92	1.87	1.31	1.22
O15145	ARPC3 Actin-related protein 2/3 complex subunit 3	ARPC3	0.81	0	2.65	1.98	1.32	1.22
P50748	KNTC1 Kinetochore-associated protein 1	KNTC1	1.19	1.44	1.97	1.15	1.39	1.22
P13667	PDIA4 Protein disulfide-isomerase A4	PDIA4	0.96	0.87	1.07	1.66	1.49	1.22
Q13200	PSMD2 26S proteasome non-ATPase regulatory subunit 2	PSMD2	1.49	1.38	1.71	1.05	1.34	1.23
P62158	CALM3 Calmodulin	CALM3	1.62	2.46	1.56	0.97	1.39	1.23
Q99832	CCT7 T-complex protein 1 subunit eta	CCT7	1.02	1.37	1.97	1.76	1.51	1.23
P00558	PGK1 Phosphoglycerate kinase 1	PGK1	1.19	1.34	2.16	1.76	1.64	1.23
P22392	NME2 Nucleoside diphosphate kinase B	NME2	1.53	1.42	1.21	1.2	1.67	1.23
O00204	SULT2B1 Sulfotransferase family cytosolic 2B member 1	SULT2B1	0.66	0.86	4.97	0	0	1.23
P43246	MSH2 DNA mismatch repair protein Msh2	MSH2	0	1.18	0	0	0	1.23
Q96RQ3	MCCC1 Methylcrotonoyl-CoA carboxylase subunit alpha, mit	MCCC1	1.3	1.25	1.06	1.1	1.33	1.24
P63244	GNB2L1 Guanine nucleotide-binding protein subunit beta-2-	GNB2L1	0.94	0	1.41	1.47	1.37	1.24
O95373	IPO7 Importin-7	IPO7	1.15	1.46	2.16	1.49	1.39	1.24
P14174	MIF Macrophage migration inhibitory factor	MIF	1.48	1.4	1.29	1.23	1.52	1.24
Q8TEX9	IPO4 Importin-4	IPO4	1.12	1.42	2.21	1.67	1.52	1.24
Q9UBE0	SAE1 SUMO-activating enzyme subunit 1	SAE1	0.9	0.9	1.88	0	0	1.24
Q16719	KYNU Kynureninase	KYNU	1.33	1.19	1.49	1.06	0	1.24
P30040	ERP29 Endoplasmic reticulum resident protein 29	ERP29	1.07	1.15	0	0	1.1	1.25
Q9Y2A7	NCKAP1 Nck-associated protein 1	NCKAP1	0.65	0.94	0.31	0	1.19	1.25
P52701	MSH6 DNA mismatch repair protein Msh6	MSH6	1.07	1.31	2.05	1.35	1.32	1.25
P11142	HSPA8 Heat shock cognate 71 kDa protein	HSPA8	7.75	12.97	0.3	0.18	1.36	1.25
Q13011	ECH1 Delta(3,5)-Delta(2,4)-dienoyl-CoA isomerase, mitoc	ECH1	0	0	1.22	0	0.98	1.26
Q06210	GFPT1 Glucosamine--fructose-6-phosphate aminotransferase	GFPT1	1.03	1.4	1.92	1.54	1.28	1.26
P50570	DNM2 Dynamin-2	DNM2	1.02	1.29	1.38	1.33	0	1.26
Q9UBT2	UBA2 SUMO-activating enzyme subunit 2	UBA2	0.81	1.15	2.75	1.5	1.39	1.27
O43707	ACTN4 Alpha-actinin-4	ACTN4	0.99	1.22	1.7	0.98	1.62	1.27
P30044	PRDX5 Peroxiredoxin-5, mitochondrial	PRDX5	0.69	1.04	2.52	2.13	1.68	1.27
P00338	LDHA L-lactate dehydrogenase A chain	LDHA	1.51	2.17	1.31	0	0	1.27
Q6AI08	HEATR6 HEAT repeat-containing protein 6	HEATR6	1.2	1.31	1.9	1.48	1.27	1.28
P06733	ENO1 Alpha-enolase	ENO1	1.27	1.08	1.39	1.19	1.2	1.29
Q9BWD1	ACAT2 Acetyl-CoA acetyltransferase, cytosolic	ACAT2	0.8	1.27	0	1.52	1.46	1.29
Q9BQA1	WDR77 Methylosome protein 50	WDR77	1.05	1.12	2.7	1.14	0	1.29
P31040	SDHA Succinate dehydrogenase	SDHA	0	1.66	0	0	0	1.29
O00170	AIP AH receptor-interacting protein	AIP	0.87	0	0	2.4	0	1.29
P22314	UBA1 Ubiquitin-like modifier-activating enzyme 1	UBA1	1.41	1.32	1.48	1.23	1.38	1.3
P50395	GDI2 Rab GDP dissociation inhibitor beta	GDI2	1.36	1.45	1.21	1.57	1.44	1.3
P25789	PSMA4 Proteasome subunit alpha type-4	PSMA4	1.23	0	0	0	0	1.3
Q9UL46	PSME2 Proteasome activator complex subunit 2	PSME2	0.51	0.68	3.55	2.09	1.44	1.31
P11766	ADH5 Alcohol dehydrogenase class-3	ADH5	0.63	1	2.25	0	1.05	1.32
P26641	EEF1G Elongation factor 1-gamma	EEF1G	1.01	1.01	1.66	1.43	1.34	1.32
Q9NTZ6	RBM12 RNA-binding protein 12	RBM12	0.3	0.27	0	5.38	0	1.32
P19012	KRT15 Keratin, type I cytoskeletal 15	KRT15	0	0	0	0	0	1.32
P42224	STAT1 Signal transducer and activator of transcription 1	STAT1	0.94	1.02	2.39	1.32	1.64	1.33
Q15257	PPP2R4 Serine/threonine-protein phosphatase 2A activator	PPP2R4	2.48	0	0	0	0	1.33
P30041	PRDX6 Peroxiredoxin-6	PRDX6	1.06	1.06	1.96	1.52	1.34	1.34
Q92945	KHSRP Far upstream element-binding protein 2	KHSRP	0.65	0.83	1.81	0	1.34	1.35
P11498	PC Pyruvate carboxylase, mitochondrial	PC	1.55	1.48	1.23	1.25	1.55	1.35
P07437	TUBB Tubulin beta chain	TUBB	1.17	1.31	2.23	1.04	1.27	1.36
P04075	ALDOA Fructose-bisphosphate aldolase A	ALDOA	1.58	1.47	1.44	1.19	1.51	1.36
Q5T4S7	UBR4 E3 ubiquitin-protein ligase UBR4	UBR4	0	1.14	0	0	0	1.36
P60174	TPI1 Triosephosphate isomerase	TPI1	1.27	1.31	1.6	1.35	1.32	1.37
P62258	YWHAE 14-3-3 protein epsilon	YWHAE	1.01	1.68	1.7	0	1.44	1.37
P07814	EPRS Bifunctional glutamate/proline--tRNA ligase	EPRS	1.46	1.23	14.16	1.34	0	1.37
Reverse_Q8TF76	GSG2 Serine/threonine-protein kinase haspin	GSG2	0	0	0	0	0	1.37
Q9BTW9	TBCD Tubulin-specific chaperone D	TBCD	1.42	1.48	0	1.43	1.16	1.38
P30101	PDIA3 Protein disulfide-isomerase A3	PDIA3	1.12	1.19	2.49	1.98	1.86	1.38
Q13085	ACACA Acetyl-CoA carboxylase 1	ACACA	1.51	1.5	1.3	1.25	1.62	1.39
P47756	CAPZB F-actin-capping protein subunit beta	CAPZB	1.01	1.64	1.81	0	0	1.39
P37802	TAGLN2 Transgelin-2	TAGLN2	1.73	1.66	1.19	1.2	1.44	1.4
P13010	XRCC5 X-ray repair cross-complementing protein 5	XRCC5	1.11	1.21	1.21	1.21	1.66	1.4
Q9HC38	GLOD4 Glyoxalase domain-containing protein 4	GLOD4	1.03	0	2.14	0	0	1.41
Q9H6S3	EPS8L2 Epidermal growth factor receptor kinase substrate	EPS8L2	0	0	0	0	0	1.41
P48643	CCT5 T-complex protein 1 subunit epsilon	CCT5	0.95	1.5	1.78	1.92	1.47	1.43
O00487	PSMD14 26S proteasome non-ATPase regulatory subunit 14	PSMD14	1.09	1.09	0	0	0	1.43
Q96D46	NMD3 60S ribosomal export protein NMD3	NMD3	1.25	1.23	1.95	1.62	1.34	1.44
P25205	MCM3 DNA replication licensing factor MCM3	MCM3	0.92	1	2.25	1.42	1.28	1.45
O00299	CLIC1 Chloride intracellular channel protein 1	CLIC1	1.22	1.44	1.59	0	1.5	1.45
P15924	DSP Desmoplakin	DSP	1.13	2	4.18	5.27	1.67	1.46
Q99873	PRMT1 Protein arginine N-methyltransferase 1	PRMT1	0.97	1.01	2.04	1.55	1.31	1.47
P25787	PSMA2 Proteasome subunit alpha type-2	PSMA2	0	0	0	0	0	1.48
Q9NYU2	UGGT1 UDP-glucose:glycoprotein glucosyltransferase 1	UGGT1	1.29	0.93	0	0	0.9	1.5
P43251	BTD Biotinidase	BTD	1.67	1.5	1.42	1.33	1.54	1.52
P52597	HNRNPF Heterogeneous nuclear ribonucleoprotein F	HNRNPF	0	0	2.15	0	0.93	1.55
P42126	ECI1 Enoyl-CoA delta isomerase 1, mitochondrial	ECI1	0.87	1.02	0	0	0	1.56
P38606	ATP6V1A V-type proton ATPase catalytic subunit A	ATP6V1A	1	0	0	0	0	1.56
Q9H1B7	IRF2BPL Interferon regulatory factor 2-binding protein-lik	IRF2BPL	0	0	1.95	0	0	1.58
P31946	YWHAB 14-3-3 protein beta/alpha	YWHAB	1.05	2.17	1.82	0	1.32	1.6
P35520	CBS Cystathionine beta-synthase	CBS	0.89	0.87	0	2.12	0	1.6
P23528	CFL1 Cofilin-1	CFL1	1.17	1.03	2.1	1.67	1.42	1.62
Q15019	SEPT2 Septin-2	SEPT2	1.16	2.79	1.3	0	1.57	1.65
P61160	ACTR2 Actin-related protein 2	ACTR2	1.06	1.31	3	1.12	1.72	1.69
Q96FW1	OTUB1 Ubiquitin thioesterase OTUB1	OTUB1	0.84	0.99	1.93	1.21	0	1.7
P52292	KPNA2 Importin subunit alpha-2	KPNA2	1.21	0	0	2.42	1.55	1.75
Q9UHX1	PUF60 Poly(U)-binding-splicing factor PUF60	PUF60	1.68	0	0	2.56	2.65	1.88
Q4ZG55	GREB1 Protein GREB1	GREB1	1.68	1.4	0	0	0	1.88
O00763	ACACB Acetyl-CoA carboxylase 2	ACACB	1.88	1.57	1.42	1.4	1.92	1.97
P62805	HIST4H4 Histone H4	HIST4H4	1.32	0	0	0.97	0	2.03
P15311	EZR Ezrin	EZR	1.12	0	1.51	0	0	2.09
Q6IA86	ELP2 Elongator complex protein 2	ELP2	0	0	0	0	0	2.11
P50991	CCT4 T-complex protein 1 subunit delta	CCT4	0.68	0	2.41	1.44	1.36	2.15
P42345	MTOR Serine/threonine-protein kinase mTOR	MTOR	0	0	0	0	0	2.16
Q16881	TXNRD1 Thioredoxin reductase 1, cytoplasmic	TXNRD1	1	1.08	1.73	1.39	1.4	2.29
P20618	PSMB1 Proteasome subunit beta type-1	PSMB1	1.41	2.05	0	0	0	2.31
P78347	GTF2I General transcription factor II-I	GTF2I	0	3.02	0	0	0	3.38
P52888	THOP1 Thimet oligopeptidase	THOP1	0	1.35	0	1.35	1.5	9.6
P15559	NQO1 NAD(P)H dehydrogenase	NQO1	0.63	0.73	1.79	1.34	1.03	10.7
P13647	KRT5 Keratin, type II cytoskeletal 5	KRT5	15	20	0	20	20	20
P02538	KRT6A Keratin, type II cytoskeletal 6A	KRT6A	20	20	20	20	20	20
P04264	KRT1 Keratin, type II cytoskeletal 1	KRT1	20	20	20	20	20	20
P13645	KRT10 Keratin, type I cytoskeletal 10	KRT10	20	20	20	20	20	20
P35527	KRT9 Keratin, type I cytoskeletal 9	KRT9	20	20	20	20	20	20
P35908	KRT2 Keratin, type II cytoskeletal 2 epidermal	KRT2	20	20	20	20	20	20
Q01469	FABP5 Fatty acid-binding protein, epidermal	FABP5	20	20	20	20	20	20
P49915	GMPS GMP synthase	GMPS	1.25	1.5	2.43	2.83	0	20
Q07021	C1QBP Complement component 1 Q subcomponent-binding prot	C1QBP	1.31	5.53	0	0	0	20
O43790	KRT86 Keratin, type II cuticular Hb6	KRT86	0	0	0	0	0	20
P02768	ALB Serum albumin	ALB	0	0	0	0	0	20
P78386	KRT85 Keratin, type II cuticular Hb5	KRT85	0	0	0	0	0	20
Q14525	KRT33B Keratin, type I cuticular Ha3-II	KRT33B	0	0	0	0	0	20
Q9NSB4	KRT82 Keratin, type II cuticular Hb2	KRT82	0	0	0	0	0	20
P13674	P4HA1 Prolyl 4-hydroxylase subunit alpha-1	P4HA1	0	1.12	0	0	0.41	0
P42166	TMPO Lamina-associated polypeptide 2, isoform alpha	TMPO	0	0	0	0.84	0.68	0
P25705	ATP5A1 ATP synthase subunit alpha, mitochondrial	ATP5A1	1.38	0	1.25	0	0.8	0
Q14258	TRIM25 E3 ubiquitin/ISG15 ligase TRIM25	TRIM25	0.63	0.78	1.54	1.3	0.86	0
P14550	AKR1A1 Alcohol dehydrogenase	AKR1A1	1.12	0	0	0.94	0.92	0
P56545	CTBP2 C-terminal-binding protein 2	CTBP2	0	1.21	1.28	0.98	0.94	0
P30038	ALDH4A1 Delta-1-pyrroline-5-carboxylate dehydrogenase, mit	ALDH4A1	0	0.98	0	0	0.95	0
P38919	EIF4A3 Eukaryotic initiation factor 4A-III	EIF4A3	0	1.32	0	0	0.95	0
Q8NBS9	TXNDC5 Thioredoxin domain-containing protein 5	TXNDC5	0.59	0.71	1.5	1.29	1	0
Q13547	HDAC1 Histone deacetylase 1	HDAC1	0.94	0	1.71	0	1.01	0
P49721	PSMB2 Proteasome subunit beta type-2	PSMB2	0.66	0.73	1.25	1.03	1.02	0
P62826	RAN GTP-binding nuclear protein Ran	RAN	0	0.98	1.14	1.12	1.02	0
Q12769	NUP160 Nuclear pore complex protein Nup160	NUP160	1.11	0	0	0	1.02	0
O43684	BUB3 Mitotic checkpoint protein BUB3	BUB3	0.75	0	1.67	0	1.03	0
P55084	HADHB Trifunctional enzyme subunit beta, mitochondrial	HADHB	1.34	1.09	0.99	0.89	1.04	0
P61163	ACTR1A Alpha-centractin	ACTR1A	0	0	0	0.8	1.04	0
Q9Y230	RUVBL2 RuvB-like 2	RUVBL2	1.13	0	0.94	0	1.07	0
P99999	CYCS Cytochrome c	CYCS	0.84	0	0	0.64	1.08	0
O00148	DDX39A ATP-dependent RNA helicase DDX39A	DDX39A	0	0	2	0.99	1.09	0
P51665	PSMD7 26S proteasome non-ATPase regulatory subunit 7	PSMD7	0	1.38	0	1.12	1.1	0
Q10713	PMPCA Mitochondrial-processing peptidase subunit alpha	PMPCA	1.34	1.57	1.13	1.34	1.1	0
P55884	EIF3B Eukaryotic translation initiation factor 3 subunit	EIF3B	1.11	0	0	1.32	1.1	0
P30086	PEBP1 Phosphatidylethanolamine-binding protein 1	PEBP1	1.38	0	0	0	1.1	0
Q92973	TNPO1 Transportin-1	TNPO1	0.85	1.12	1.42	1.15	1.12	0
O00303	EIF3F Eukaryotic translation initiation factor 3 subunit	EIF3F	0	2.38	0	0	1.12	0
P00367	GLUD1 Glutamate dehydrogenase 1, mitochondrial	GLUD1	1.27	0	0	1.36	1.12	0
P40925	MDH1 Malate dehydrogenase, cytoplasmic	MDH1	0.98	0.92	1.65	0	1.13	0
Q9NZ08	ERAP1 Endoplasmic reticulum aminopeptidase 1	ERAP1	0	0	0	0.83	1.13	0
P19623	SRM Spermidine synthase	SRM	0	0	0	0	1.13	0
O60341	KDM1A Lysine-specific histone demethylase 1A	KDM1A	0	1.16	0	1.16	1.14	0
Q9Y3I0	C22orf28 tRNA-splicing ligase RtcB homolog	C22orf28	1.15	0	1.16	1.05	1.16	0
Q13363	CTBP1 C-terminal-binding protein 1	CTBP1	0	0	0	1.09	1.16	0
Q93008	USP9X Probable ubiquitin carboxyl-terminal hydrolase FAF	USP9X	0	1.13	0	1.48	1.18	0
P29373	CRABP2 Cellular retinoic acid-binding protein 2	CRABP2	0	2.12	0	0	1.18	0
P17987	TCP1 T-complex protein 1 subunit alpha	TCP1	1.05	1.21	1.98	1.32	1.2	0
P10253	GAA Lysosomal alpha-glucosidase	GAA	1.24	1.04	0	0.96	1.21	0
P35580	MYH10 Myosin-10	MYH10	0	1.49	1.5	0	1.21	0
Q13185	CBX3 Chromobox protein homolog 3	CBX3	6.39	7.33	0.41	0	1.21	0
O15143	ARPC1B Actin-related protein 2/3 complex subunit 1B	ARPC1B	0.84	0.74	1.41	0	1.23	0
Q52LJ0	FAM98B Protein FAM98B	FAM98B	1.4	0.84	0	1.39	1.23	0
P52895	AKR1C2 Aldo-keto reductase family 1 member C2	AKR1C2	1	1.02	1.11	1.07	1.23	0
P30876	POLR2B DNA-directed RNA polymerase II subunit RPB2	POLR2B	1.22	1.2	0	1.29	1.23	0
P43686	PSMC4 26S protease regulatory subunit 6B	PSMC4	1.05	1.39	1.5	20	1.23	0
P00491	PNP Purine nucleoside phosphorylase	PNP	0.87	0	1.45	1.2	1.23	0
P12004	PCNA Proliferating cell nuclear antigen	PCNA	1.24	0	1.39	0	1.23	0
Q9UIC8	LCMT1 Leucine carboxyl methyltransferase 1	LCMT1	0	1.38	0	0	1.24	0
P61221	ABCE1 ATP-binding cassette sub-family E member 1	ABCE1	1.1	0	1.59	0	1.24	0
P35080	PFN2 Profilin-2	PFN2	0	0	0	0	1.24	0
Q15654	TRIP6 Thyroid receptor-interacting protein 6	TRIP6	0.61	0	0	1.86	1.25	0
O75874	IDH1 Isocitrate dehydrogenase	IDH1	1.38	1.05	1.23	0	1.26	0
P42858	HTT Huntingtin	HTT	0	2.15	0	0	1.28	0
Q96EK6	GNPNAT1 Glucosamine 6-phosphate N-acetyltransferase	GNPNAT1	0	0	0	1.09	1.28	0
P38117	ETFB Electron transfer flavoprotein subunit beta	ETFB	0	0	0	0	1.28	0
O43242	PSMD3 26S proteasome non-ATPase regulatory subunit 3	PSMD3	1.19	7.75	0	1.02	1.29	0
Q9BXJ9	NAA15 N-alpha-acetyltransferase 15, NatA auxiliary subun	NAA15	0	1.57	2.1	0	1.31	0
P62879	GNB2 Guanine nucleotide-binding protein G(I)/G(S)/G(T)	GNB2	0	0	1.82	0	1.32	0
P11177	PDHB Pyruvate dehydrogenase E1 component subunit beta,	PDHB	0	0	0	0	1.32	0
Q53H96	PYCRL Pyrroline-5-carboxylate reductase 3	PYCRL	0.63	1.02	2.14	1.54	1.33	0
P00390	GSR Glutathione reductase, mitochondrial	GSR	1	1.17	2.44	2.04	1.33	0
Q9NR50	EIF2B3 Translation initiation factor eIF-2B subunit gamma	EIF2B3	0	0	0	0	1.33	0
Q8NEZ5	FBXO22 F-box only protein 22	FBXO22	0	1.23	0	0	1.35	0
P06865	HEXA Beta-hexosaminidase subunit alpha	HEXA	0.99	0	0	0	1.35	0
O43143	DHX15 Putative pre-mRNA-splicing factor ATP-dependent RN	DHX15	1.13	1.02	2.31	1.44	1.37	0
P51570	GALK1 Galactokinase	GALK1	1.13	1.29	1.49	1.52	1.37	0
Q13838	DDX39B Spliceosome RNA helicase DDX39B	DDX39B	1.08	1.19	1.33	7.33	1.38	0
P13929	ENO3 Beta-enolase	ENO3	0	1.35	1.2	0	1.39	0
O75223	GGCT Gamma-glutamylcyclotransferase	GGCT	0.79	1.23	0	0	1.4	0
P62249	RPS16 40S ribosomal protein S16	RPS16	0	1.29	2.11	1.77	1.4	0
P13646	KRT13 Keratin, type I cytoskeletal 13	KRT13	0	0.92	3.83	11.28	1.41	0
P34897	SHMT2 Serine hydroxymethyltransferase, mitochondrial	SHMT2	1.02	1.19	1.09	0	1.41	0
Q16698	DECR1 2,4-dienoyl-CoA reductase, mitochondrial	DECR1	0	0	1.59	1.15	1.42	0
O75608	LYPLA1 Acyl-protein thioesterase 1	LYPLA1	0	0	1.66	0	1.42	0
P28074	PSMB5 Proteasome subunit beta type-5	PSMB5	0	1.59	0.88	0	1.44	0
P45983	MAPK8 Mitogen-activated protein kinase 8	MAPK8	2.33	0	1.01	0.68	1.44	0
Q13435	SF3B2 Splicing factor 3B subunit 2	SF3B2	0.8	0.95	0	2.34	1.45	0
P54727	RAD23B UV excision repair protein RAD23 homolog B	RAD23B	1.16	1.31	2.05	1.34	1.45	0
Q12765	SCRN1 Secernin-1	SCRN1	0.99	0	2.08	1.48	1.45	0
Q15437	SEC23B Protein transport protein Sec23B	SEC23B	1.07	1.56	0	1.18	1.46	0
Q9UMS4	PRPF19 Pre-mRNA-processing factor 19	PRPF19	0	0	0	0	1.46	0
P62081	RPS7 40S ribosomal protein S7	RPS7	1.62	2.22	0	0	1.47	0
P22102	GART Trifunctional purine biosynthetic protein adenosin	GART	1.06	1.46	2.54	1.61	1.48	0
P21399	ACO1 Cytoplasmic aconitate hydratase	ACO1	0	0.81	4.77	0	1.5	0
P31153	MAT2A S-adenosylmethionine synthase isoform type-2	MAT2A	0	0	0	0	1.51	0
P17980	PSMC3 26S protease regulatory subunit 6A	PSMC3	1.27	1.22	1.51	1.02	1.52	0
Q09028	RBBP4 Histone-binding protein RBBP4	RBBP4	0	1.55	0	0	1.52	0
P36578	RPL4 60S ribosomal protein L4	RPL4	0	1.16	1.77	0	1.53	0
P62269	RPS18 40S ribosomal protein S18	RPS18	1.75	0	1.33	0	1.53	0
P15531	NME1 Nucleoside diphosphate kinase A	NME1	1.29	1.52	1.46	1.27	1.56	0
P12955	PEPD Xaa-Pro dipeptidase	PEPD	0	0.97	2.75	2.34	1.58	0
P23526	AHCY Adenosylhomocysteinase	AHCY	12.19	1.25	0	1.23	1.58	0
O60502	MGEA5 Bifunctional protein NCOAT	MGEA5	0.91	1.03	2.35	1.7	1.59	0
Q562R1	ACTBL2 Beta-actin-like protein 2	ACTBL2	0	1.56	2.06	1.5	1.59	0
P15586	GNS N-acetylglucosamine-6-sulfatase	GNS	0	1.1	0	0	1.61	0
Q8WUM4	PDCD6IP Programmed cell death 6-interacting protein	PDCD6IP	0.81	1.09	2.01	0	1.69	0
Q15181	PPA1 Inorganic pyrophosphatase	PPA1	1.33	0	0	0	1.8	0
P62753	RPS6 40S ribosomal protein S6	RPS6	0	0	1.67	0	1.85	0
O60506	SYNCRIP Heterogeneous nuclear ribonucleoprotein Q	SYNCRIP	0	1.74	0	0	1.86	0
Q13228	SELENBP1 Selenium-binding protein 1	SELENBP1	0.92	1.06	0	1.23	1.87	0
P54652	HSPA2 Heat shock-related 70 kDa protein 2	HSPA2	1.09	3.17	1.39	0	1.87	0
Q16576	RBBP7 Histone-binding protein RBBP7	RBBP7	0	1.62	2.36	0	2.1	0
P09972	ALDOC Fructose-bisphosphate aldolase C	ALDOC	0	0	0	0	2.1	0
Q29RF7	PDS5A Sister chromatid cohesion protein PDS5 homolog A	PDS5A	1.02	1.32	0	1.45	2.11	0
P63000	RAC1 Ras-related C3 botulinum toxin substrate 1	RAC1	0	0	0	0	2.36	0
Reverse_O94822	LTN1 E3 ubiquitin-protein ligase listerin	LTN1	0	0	0	0	3.61	0
P25398	RPS12 40S ribosomal protein S12	RPS12	0	0	0	0	10.56	0
P09429	HMGB1 High mobility group protein B1	HMGB1	0	1.34	0	1.48	10.86	0
P35998	PSMC2 26S protease regulatory subunit 7	PSMC2	0.85	0.91	0	4.55	20	0
P81605	DCD Dermcidin	DCD	0	20	0	0	20	0
P60842	EIF4A1 Eukaryotic initiation factor 4A-I	EIF4A1	1.52	0	0	1.38	20	0
Q96GA7	SDSL Serine dehydratase-like	SDSL	0.55	0.66	2.45	0	0	0
Q86X55	CARM1 Histone-arginine methyltransferase CARM1	CARM1	0	0.69	0	1.44	0	0
Q96RP9	GFM1 Elongation factor G, mitochondrial	GFM1	0	0.69	0	0	0	0
P30048	PRDX3 Thioredoxin-dependent peroxide reductase, mitochon	PRDX3	0	0.71	1.58	1.46	0	0
Q8TAT6	NPLOC4 Nuclear protein localization protein 4 homolog	NPLOC4	0	0.71	0	0	0	0
Q9Y314	NOSIP Nitric oxide synthase-interacting protein	NOSIP	0.88	0.75	0	0	0	0
P49589	CARS Cysteine--tRNA ligase, cytoplasmic	CARS	0	0.76	0	0	0	0
O14787	TNPO2 Transportin-2	TNPO2	0	0.77	0	0	0	0
Q92466	DDB2 DNA damage-binding protein 2	DDB2	0	0.78	0	0	0	0
P23246	SFPQ Splicing factor, proline- and glutamine-rich	SFPQ	0	0.82	1.62	0	0	0
P07339	CTSD Cathepsin D	CTSD	0	0.87	0	0	0	0
Q9H9P8	L2HGDH L-2-hydroxyglutarate dehydrogenase, mitochondrial	L2HGDH	1.25	0.88	0	0	0	0
O95671	ASMTL N-acetylserotonin O-methyltransferase-like protein	ASMTL	0.75	0.89	1.98	0	0	0
O43776	NARS Asparagine--tRNA ligase, cytoplasmic	NARS	1.01	0.9	0	0.96	0	0
P53004	BLVRA Biliverdin reductase A	BLVRA	0	0.9	0	1.04	0	0
Q92599	SEPT8 Septin-8	SEPT8	0	0.91	0	1.12	0	0
Q9UL15	BAG5 BAG family molecular chaperone regulator 5	BAG5	0	0.91	0	0	0	0
O76094	SRP72 Signal recognition particle 72 kDa protein	SRP72	0	0.92	0	0	0	0
O15230	LAMA5 Laminin subunit alpha-5	LAMA5	0	0.93	0	0	0	0
Q7KZ85	SUPT6H Transcription elongation factor SPT6	SUPT6H	0	0.93	0	0	0	0
Q5SRE5	NUP188 Nucleoporin NUP188 homolog	NUP188	0	0.96	0	0	0	0
Q9UBW7	ZMYM2 Zinc finger MYM-type protein 2	ZMYM2	0	0.96	0	0	0	0
P60660	MYL6 Myosin light polypeptide 6	MYL6	0.96	0.98	0	1.78	0	0
P16152	CBR1 Carbonyl reductase	CBR1	0	0.98	2.08	1.41	0	0
Q15029	EFTUD2 116 kDa U5 small nuclear ribonucleoprotein compone	EFTUD2	0	0.99	0	0	0	0
P36405	ARL3 ADP-ribosylation factor-like protein 3	ARL3	0.89	1	0	0	0	0
P21266	GSTM3 Glutathione S-transferase Mu 3	GSTM3	1.03	1	0	0	0	0
P22061	PCMT1 Protein-L-isoaspartate(D-aspartate) O-methyltransf	PCMT1	1.01	1.01	0	1.35	0	0
P08397	HMBS Porphobilinogen deaminase	HMBS	1.03	1.01	0	1.22	0	0
Q06203	PPAT Amidophosphoribosyltransferase	PPAT	0	1.01	1.54	0	0	0
Q14152	EIF3A Eukaryotic translation initiation factor 3 subunit	EIF3A	0	1.01	0	0	0	0
P23921	RRM1 Ribonucleoside-diphosphate reductase large subunit	RRM1	0.91	1.02	0	0	0	0
P78371	CCT2 T-complex protein 1 subunit beta	CCT2	0.85	1.03	0	1.3	0	0
P68400	CSNK2A1 Casein kinase II subunit alpha	CSNK2A1	0	1.03	0	0	0	0
Q9UNM6	PSMD13 26S proteasome non-ATPase regulatory subunit 13	PSMD13	0	1.04	1.26	1.27	0	0
O14579	COPE Coatomer subunit epsilon	COPE	0	1.04	0	0	0	0
P36776	LONP1 Lon protease homolog, mitochondrial	LONP1	0.68	1.06	2.09	0	0	0
Q15020	SART3 Squamous cell carcinoma antigen recognized by T-ce	SART3	0	1.06	0	0.97	0	0
Q00796	SORD Sorbitol dehydrogenase	SORD	0.9	1.08	0	0	0	0
P84085	ARF5 ADP-ribosylation factor 5	ARF5	0	1.12	0	0	0	0
P26440	IVD Isovaleryl-CoA dehydrogenase, mitochondrial	IVD	0.87	1.14	0	0.68	0	0
Q9UHY1	NRBP1 Nuclear receptor-binding protein	NRBP1	0.92	1.14	0	1.41	0	0
Q9UM54	MYO6 Unconventional myosin-VI	MYO6	0	1.14	0	1.2	0	0
Q5TFE4	NT5DC1 5-nucleotidase domain-containing protein 1	NT5DC1	0	1.14	0	0	0	0
O00154	ACOT7 Cytosolic acyl coenzyme A thioester hydrolase	ACOT7	1.1	1.16	1.62	0	0	0
P51148	RAB5C Ras-related protein Rab-5C	RAB5C	1.32	1.17	1.33	0	0	0
Q92947	GCDH Glutaryl-CoA dehydrogenase, mitochondrial	GCDH	1.08	1.2	0	0	0	0
P46060	RANGAP1 Ran GTPase-activating protein 1	RANGAP1	0	1.2	0	0.94	0	0
O95834	EML2 Echinoderm microtubule-associated protein-like 2	EML2	0	1.2	0	0	0	0
Q9NTK5	OLA1 Obg-like ATPase 1	OLA1	0.95	1.26	0	1.95	0	0
P45984	MAPK9 Mitogen-activated protein kinase 9	MAPK9	1.02	1.26	20	0	0	0
P18669	PGAM1 Phosphoglycerate mutase 1	PGAM1	0	1.26	0	0	0	0
P49419	ALDH7A1 Alpha-aminoadipic semialdehyde dehydrogenase	ALDH7A1	0	1.26	0	0	0	0
Q9NQW7	XPNPEP1 Xaa-Pro aminopeptidase 1	XPNPEP1	0	1.28	0	0	0	0
P35221	CTNNA1 Catenin alpha-1	CTNNA1	0	1.3	0	0	0	0
P17931	LGALS3 Galectin-3	LGALS3	0	1.31	0	0	0	0
Q8TEQ6	GEMIN5 Gem-associated protein 5	GEMIN5	0	1.32	0	0	0	0
Q99460	PSMD1 26S proteasome non-ATPase regulatory subunit 1	PSMD1	0.81	1.39	1.16	0	0	0
O60884	DNAJA2 DnaJ homolog subfamily A member 2	DNAJA2	1.16	1.4	0	0	0	0
Q96AB3	ISOC2 Isochorismatase domain-containing protein 2, mitoc	ISOC2	1.17	1.4	0	1.35	0	0
P54725	RAD23A UV excision repair protein RAD23 homolog A	RAD23A	1.62	1.5	0	2.62	0	0
P57740	NUP107 Nuclear pore complex protein Nup107	NUP107	0	1.53	0	0	0	0
Q09161	NCBP1 Nuclear cap-binding protein subunit 1	NCBP1	0.94	1.55	1.81	1.55	0	0
P31947	SFN 14-3-3 protein sigma	SFN	0.86	1.56	0	0	0	0
Q15021	NCAPD2 Condensin complex subunit 1	NCAPD2	0	1.6	0	0	0	0
Q16181	SEPT7 Septin-7	SEPT7	0	1.63	1.56	0	0	0
P27361	MAPK3 Mitogen-activated protein kinase 3	MAPK3	1.28	1.64	0	1.25	0	0
Q16531	DDB1 DNA damage-binding protein 1	DDB1	0	1.64	0	1.15	0	0
P25788	PSMA3 Proteasome subunit alpha type-3	PSMA3	0	1.64	0	0	0	0
P14868	DARS Aspartate--tRNA ligase, cytoplasmic	DARS	1.49	1.65	0	1.11	0	0
Q96P63	SERPINB12 Serpin B12	SERPINB12	0	1.65	0	20	0	0
Q15436	SEC23A Protein transport protein Sec23A	SEC23A	0	1.67	0	0.93	0	0
Q9H2U2	PPA2 Inorganic pyrophosphatase 2, mitochondrial	PPA2	1.16	1.68	0	0	0	0
P78406	RAE1 mRNA export factor	RAE1	0	1.72	0	0	0	0
Q8N8N7	PTGR2 Prostaglandin reductase 2	PTGR2	1.1	1.76	0	0	0	0
P12814	ACTN1 Alpha-actinin-1	ACTN1	1.17	1.81	0	1.41	0	0
Q14839	CHD4 Chromodomain-helicase-DNA-binding protein 4	CHD4	0	1.9	1.85	0.9	0	0
P32322	PYCR1 Pyrroline-5-carboxylate reductase 1, mitochondrial	PYCR1	0	1.92	0	0	0	0
P31689	DNAJA1 DnaJ homolog subfamily A member 1	DNAJA1	1.26	1.98	0	0	0	0
P61313	RPL15 60S ribosomal protein L15	RPL15	1.28	1.98	0	0	0	0
P32119	PRDX2 Peroxiredoxin-2	PRDX2	0	2.14	1.9	0	0	0
P40227	CCT6A T-complex protein 1 subunit zeta	CCT6A	1.22	2.36	0	0	0	0
P68371	TUBB4B Tubulin beta-4B chain	TUBB4B	1.66	2.36	2.46	1.69	0	0
O15382	BCAT2 Branched-chain-amino-acid aminotransferase, mitoch	BCAT2	1.76	3.15	0	0.71	0	0
P10619	CTSA Lysosomal protective protein	CTSA	0	3.66	0	0	0	0
Q9HA64	FN3KRP Ketosamine-3-kinase	FN3KRP	0	3.86	0	0	0	0
P22033	MUT Methylmalonyl-CoA mutase, mitochondrial	MUT	0	6.52	0	0	0	0
P14923	JUP Junction plakoglobin	JUP	2.88	7.29	0	20	0	0
P49748	ACADVL Very long-chain specific acyl-CoA dehydrogenase, m	ACADVL	0.9	9.75	0.96	0.75	0	0
P34896	SHMT1 Serine hydroxymethyltransferase, cytosolic	SHMT1	1.03	9.95	0	0	0	0
Q13813	SPTAN1 Spectrin alpha chain, non-erythrocytic 1	SPTAN1	1.28	10.49	0	1.44	0	0
P01834	IGKC Ig kappa chain C region	IGKC	0	10.95	0	0	0	0
P07355	ANXA2 Annexin A2	ANXA2	0	11.62	0	0	0	0
P08779	KRT16 Keratin, type I cytoskeletal 16	KRT16	20	20	0	20	0	0
Q04695	KRT17 Keratin, type I cytoskeletal 17	KRT17	20	20	0	0	0	0
P29508	SERPINB3 Serpin B3	SERPINB3	0	20	0	20	0	0
Q5T749	KPRP Keratinocyte proline-rich protein	KPRP	0	20	0	20	0	0
A5YKK6	CNOT1 CCR4-NOT transcription complex subunit 1	CNOT1	0	20	0	0	0	0
P05109	S100A8 Protein S100-A8	S100A8	0	20	0	0	0	0
P06702	S100A9 Protein S100-A9	S100A9	0	20	0	0	0	0
P12273	PIP Prolactin-inducible protein	PIP	0	20	0	0	0	0
P25311	AZGP1 Zinc-alpha-2-glycoprotein	AZGP1	0	20	0	0	0	0
Q7Z794	KRT77 Keratin, type II cytoskeletal 1b	KRT77	0	20	0	0	0	0
Q9BTC0	DIDO1 Death-inducer obliterator 1	DIDO1	0	20	0	0	0	0
P49005	POLD2 DNA polymerase delta subunit 2	POLD2	0.64	0	0	6.85	0	0
Q6NVY1	HIBCH 3-hydroxyisobutyryl-CoA hydrolase, mitochondrial	HIBCH	0.7	0	1.56	1.17	0	0
P04632	CAPNS1 Calpain small subunit 1	CAPNS1	0.72	0	1.73	0	0	0
Q13162	PRDX4 Peroxiredoxin-4	PRDX4	0.78	0	0	1.79	0	0
P08559	PDHA1 Pyruvate dehydrogenase E1 component subunit alpha,	PDHA1	0.79	0	1.94	1.67	0	0
Q8TAQ2	SMARCC2 SWI/SNF complex subunit SMARCC2	SMARCC2	0.8	0	2.01	0	0	0
P50990	CCT8 T-complex protein 1 subunit theta	CCT8	0.81	0	0	1.92	0	0
Q96HE7	ERO1L ERO1-like protein alpha	ERO1L	0.82	0	2.7	0	0	0
O15144	ARPC2 Actin-related protein 2/3 complex subunit 2	ARPC2	0.83	0	0	0	0	0
Q96ST3	SIN3A Paired amphipathic helix protein Sin3a	SIN3A	0.89	0	0	2.12	0	0
Q9H3S7	PTPN23 Tyrosine-protein phosphatase non-receptor type 23	PTPN23	0.92	0	0.96	0.75	0	0
P26196	DDX6 Probable ATP-dependent RNA helicase DDX6	DDX6	0.92	0	0	1	0	0
Q8NFV4	ABHD11 Abhydrolase domain-containing protein 11	ABHD11	0.92	0	0	0	0	0
P43243	MATR3 Matrin-3	MATR3	0.93	0	0	1.64	0	0
Q6ZRV2	FAM83H Protein FAM83H	FAM83H	0.95	0	0	0	0	0
P61604	HSPE1 10 kDa heat shock protein, mitochondrial	HSPE1	0.98	0	0	0	0	0
Q9H832	UBE2Z Ubiquitin-conjugating enzyme E2 Z	UBE2Z	0.98	0	0	0	0	0
P50213	IDH3A Isocitrate dehydrogenase	IDH3A	1	0	0	0	0	0
Q9NZL4	HSPBP1 Hsp70-binding protein 1	HSPBP1	1	0	0	0	0	0
P53992	SEC24C Protein transport protein Sec24C	SEC24C	1.03	0	0	0	0	0
P07686	HEXB Beta-hexosaminidase subunit beta	HEXB	1.04	0	0	0	0	0
Q8IYQ7	THNSL1 Threonine synthase-like 1	THNSL1	1.05	0	0	0	0	0
P35270	SPR Sepiapterin reductase	SPR	1.06	0	0	0	0	0
P26368	U2AF2 Splicing factor U2AF 65 kDa subunit	U2AF2	1.07	0	0	0	0	0
Q04917	YWHAH 14-3-3 protein eta	YWHAH	1.1	0	0	0	0	0
Q99829	CPNE1 Copine-1	CPNE1	1.14	0	0	0	0	0
Q14166	TTLL12 Tubulin--tyrosine ligase-like protein 12	TTLL12	1.16	0	0	1.5	0	0
Q9UI10	EIF2B4 Translation initiation factor eIF-2B subunit delta	EIF2B4	1.2	0	0	1.29	0	0
O95155	UBE4B Ubiquitin conjugation factor E4 B	UBE4B	1.22	0	0	0	0	0
P04181	OAT Ornithine aminotransferase, mitochondrial	OAT	1.28	0	0	0	0	0
P37837	TALDO1 Transaldolase	TALDO1	1.29	0	0	0	0	0
Q12904	AIMP1 Aminoacyl tRNA synthase complex-interacting multif	AIMP1	1.33	0	0	1.09	0	0
P10768	ESD S-formylglutathione hydrolase	ESD	1.4	0	0	1.21	0	0
P68036	UBE2L3 Ubiquitin-conjugating enzyme E2 L3	UBE2L3	1.45	0	0	0	0	0
P12081	HARS Histidine--tRNA ligase, cytoplasmic	HARS	1.47	0	0	0	0	0
P08758	ANXA5 Annexin A5	ANXA5	1.5	0	1.27	1.46	0	0
Q15008	PSMD6 26S proteasome non-ATPase regulatory subunit 6	PSMD6	1.62	0	1.98	1.31	0	0
Q96GG9	DCUN1D1 DCN1-like protein 1	DCUN1D1	1.62	0	0	0	0	0
P23381	WARS Tryptophan--tRNA ligase, cytoplasmic	WARS	1.69	0	0	0	0	0
Q9H0U4	RAB1B Ras-related protein Rab-1B	RAB1B	1.71	0	1.35	0	0	0
P24666	ACP1 Low molecular weight phosphotyrosine protein phosp	ACP1	1.91	0	0	0	0	0
P31151	S100A7 Protein S100-A7	S100A7	20	0	0	0	0	0
Q9NTJ3	SMC4 Structural maintenance of chromosomes protein 4	SMC4	0	0	0	0.16	0	0
P46379	BAG6 Large proline-rich protein BAG6	BAG6	0	0	0	0.87	0	0
Q8NFF5	FLAD1 FAD synthase	FLAD1	0	0	0	1.02	0	0
O43837	IDH3B Isocitrate dehydrogenase	IDH3B	0	0	0	1.07	0	0
P24928	POLR2A DNA-directed RNA polymerase II subunit RPB1	POLR2A	0	0	0	1.3	0	0
Q9HC35	EML4 Echinoderm microtubule-associated protein-like 4	EML4	0	0	0	1.32	0	0
Q96KG9	SCYL1 N-terminal kinase-like protein	SCYL1	0	0	0	1.42	0	0
Q6YN16	HSDL2 Hydroxysteroid dehydrogenase-like protein 2	HSDL2	0	0	0	1.45	0	0
Q9H488	POFUT1 GDP-fucose protein O-fucosyltransferase 1	POFUT1	0	0	0	1.49	0	0
Q7Z3U7	MON2 Protein MON2 homolog	MON2	0	0	0	1.66	0	0
Q86Y56	HEATR2 HEAT repeat-containing protein 2	HEATR2	0	0	0	1.7	0	0
Q93074	MED12 Mediator of RNA polymerase II transcription subuni	MED12	0	0	0	1.75	0	0
Q13428	TCOF1 Treacle protein	TCOF1	0	0	0	2.59	0	0
O95336	PGLS 6-phosphogluconolactonase	PGLS	0	0	0	2.95	0	0
O00571	DDX3X ATP-dependent RNA helicase DDX3X	DDX3X	0	0	0	6.44	0	0
P19013	KRT4 Keratin, type II cytoskeletal 4	KRT4	0	0	1.79	20	0	0
P18031	PTPN1 Tyrosine-protein phosphatase non-receptor type 1	PTPN1	0	0	0	20	0	0
P31944	CASP14 Caspase-14	CASP14	0	0	0	20	0	0
P61626	LYZ Lysozyme C	LYZ	0	0	0	20	0	0
Q02413	DSG1 Desmoglein-1	DSG1	0	0	0	20	0	0
Q15517	CDSN Corneodesmosin	CDSN	0	0	0	20	0	0
Q6ZVX7	NCCRP1 Non-specific cytotoxic cell receptor protein 1 hom	NCCRP1	0	0	0	20	0	0
Q86YZ3	HRNR Hornerin	HRNR	0	0	0	20	0	0
O15260	SURF4 Surfeit locus protein 4	SURF4	0	0	0.8	0	0	0
P84103	SRSF3 Serine/arginine-rich splicing factor 3	SRSF3	0	0	1.14	0	0	0
P49903	SEPHS1 Selenide, water dikinase 1	SEPHS1	0	0	1.21	0	0	0
Q96I99	SUCLG2 Succinyl-CoA ligase	SUCLG2	0	0	1.24	0	0	0
P21291	CSRP1 Cysteine and glycine-rich protein 1	CSRP1	0	0	1.28	0	0	0
P11172	UMPS Uridine 5-monophosphate synthase	UMPS	0	0	1.36	0	0	0
O94906	PRPF6 Pre-mRNA-processing factor 6	PRPF6	0	0	1.41	0	0	0
P61970	NUTF2 Nuclear transport factor 2	NUTF2	0	0	1.45	0	0	0
Q02790	FKBP4 Peptidyl-prolyl cis-trans isomerase FKBP4	FKBP4	0	0	1.57	0	0	0
Q9H2C0	GAN Gigaxonin	GAN	0	0	1.7	0	0	0
Q96GW9	MARS2 Methionine--tRNA ligase, mitochondrial	MARS2	0	0	1.92	0	0	0
Q13907	IDI1 Isopentenyl-diphosphate Delta-isomerase 1	IDI1	0	0	2.03	0	0	0
P62829	RPL23 60S ribosomal protein L23	RPL23	0	0	2.09	0	0	0
P61758	VBP1 Prefoldin subunit 3	VBP1	0	0	2.11	0	0	0
Q9Y2S7	POLDIP2 Polymerase delta-interacting protein 2	POLDIP2	0	0	2.13	0	0	0
A6NDG6	PGP Phosphoglycolate phosphatase	PGP	0	0	2.18	0	0	0
Q03426	MVK Mevalonate kinase	MVK	0	0	2.84	0	0	0
A4UGR9	XIRP2 Xin actin-binding repeat-containing protein 2	XIRP2	0	0	20	0	0	0
A2A2Z9	ANKRD18B Ankyrin repeat domain-containing protein 18B	ANKRD18B	0	0	0	0	0	0
A2AJT9	CXorf23 Uncharacterized protein CXorf23	CXorf23	0	0	0	0	0	0
H0YI38	Uncharacterized protein	Uncharacterized	0	0	0	0	0	0
H0YIW1	Uncharacterized protein	Uncharacterized	0	0	0	0	0	0
O14917	PCDH17 Protocadherin-17	PCDH17	0	0	0	0	0	0
O14929	HAT1 Histone acetyltransferase type B catalytic subunit	HAT1	0	0	0	0	0	0
O15020	SPTBN2 Spectrin beta chain, non-erythrocytic 2	SPTBN2	0	0	0	0	0	0
O43182	ARHGAP6 Rho GTPase-activating protein 6	ARHGAP6	0	0	0	0	0	0
O43660	PLRG1 Pleiotropic regulator 1	PLRG1	0	0	0	0	0	0
O60673	REV3L DNA polymerase zeta catalytic subunit	REV3L	0	0	0	0	0	0
O75153	KIAA0664 Clustered mitochondria protein homolog	KIAA0664	0	0	0	0	0	0
O75554	WBP4 WW domain-binding protein 4	WBP4	0	0	0	0	0	0
O94979	SEC31A Protein transport protein Sec31A	SEC31A	0	0	0	0	0	0
O95678	KRT75 Keratin, type II cytoskeletal 75	KRT75	0	0	0	0	0	0
O95757	HSPA4L Heat shock 70 kDa protein 4L	HSPA4L	0	0	0	0	0	0
O95782	AP2A1 AP-2 complex subunit alpha-1	AP2A1	0	0	0	0	0	0
O95817	BAG3 BAG family molecular chaperone regulator 3	BAG3	0	0	0	0	0	0
P00966	ASS1 Argininosuccinate synthase	ASS1	0	0	0	0	0	0
P05166	PCCB Propionyl-CoA carboxylase beta chain, mitochondria	PCCB	0	0	0	0	0	0
P06737	PYGL Glycogen phosphorylase, liver form	PYGL	0	0	0	0	0	0
P07305	H1F0 Histone H1.0	H1F0	0	0	0	0	0	0
P09960	LTA4H Leukotriene A-4 hydrolase	LTA4H	0	0	0	0	0	0
P0CG38	POTEI POTE ankyrin domain family member I	POTEI	0	0	0	0	0	0
P11940	PABPC1 Polyadenylate-binding protein 1	PABPC1	0	0	0	0	0	0
P12821	ACE Angiotensin-converting enzyme	ACE	0	0	0	0	0	0
P13798	APEH Acylamino-acid-releasing enzyme	APEH	0	0	0	0	0	0
P14735	IDE Insulin-degrading enzyme	IDE	0	0	0	0	0	0
P15170	GSPT1 Eukaryotic peptide chain release factor GTP-bindin	GSPT1	0	0	0	0	0	0
P16401	HIST1H1B Histone H1.5	HIST1H1B	0	0	0	0	0	0
P20339	RAB5A Ras-related protein Rab-5A	RAB5A	0	0	0	0	0	0
P22570	FDXR NADPH:adrenodoxin oxidoreductase, mitochondrial	FDXR	0	0	0	0	0	0
P22626	HNRNPA2B1 Heterogeneous nuclear ribonucleoproteins A2/B1	HNRNPA2B1	0	0	0	0	0	0
P23786	CPT2 Carnitine O-palmitoyltransferase 2, mitochondrial	CPT2	0	0	0	0	0	0
P25054	APC Adenomatous polyposis coli protein	APC	0	0	0	0	0	0
P25685	DNAJB1 DnaJ homolog subfamily B member 1	DNAJB1	0	0	0	0	0	0
P27695	APEX1 DNA-(apurinic or apyrimidinic site) lyase	APEX1	0	0	0	0	0	0
P28070	PSMB4 Proteasome subunit beta type-4	PSMB4	0	0	0	0	0	0
P28331	NDUFS1 NADH-ubiquinone oxidoreductase 75 kDa subunit, mit	NDUFS1	0	0	0	0	0	0
P29144	TPP2 Tripeptidyl-peptidase 2	TPP2	0	0	0	0	0	0
P30042	C21orf33 ES1 protein homolog, mitochondrial	C21orf33	0	0	0	0	0	0
P30154	PPP2R1B Serine/threonine-protein phosphatase 2A 65 kDa reg	PPP2R1B	0	0	0	0	0	0
P30613	PKLR Pyruvate kinase isozymes R/L	PKLR	0	0	0	0	0	0
P31937	HIBADH 3-hydroxyisobutyrate dehydrogenase, mitochondrial	HIBADH	0	0	0	0	0	0
P31943	HNRNPH1 Heterogeneous nuclear ribonucleoprotein H	HNRNPH1	0	0	0	0	0	0
P35222	CTNNB1 Catenin beta-1	CTNNB1	0	0	0	0	0	0
P35606	COPB2 Coatomer subunit beta	COPB2	0	0	0	0	0	0
P46063	RECQL ATP-dependent DNA helicase Q1	RECQL	0	0	0	0	0	0
P46777	RPL5 60S ribosomal protein L5	RPL5	0	0	0	0	0	0
P49591	SARS Serine--tRNA ligase, cytoplasmic	SARS	0	0	0	0	0	0
P49753	ACOT2 Acyl-coenzyme A thioesterase 2, mitochondrial	ACOT2	0	0	0	0	0	0
P51553	IDH3G Isocitrate dehydrogenase	IDH3G	0	0	0	0	0	0
P51610	HCFC1 Host cell factor 1	HCFC1	0	0	0	0	0	0
P51688	SGSH N-sulphoglucosamine sulphohydrolase	SGSH	0	0	0	0	0	0
P51858	HDGF Hepatoma-derived growth factor	HDGF	0	0	0	0	0	0
P53675	CLTCL1 Clathrin heavy chain 2	CLTCL1	0	0	0	0	0	0
P53779	MAPK10 Mitogen-activated protein kinase 10	MAPK10	0	0	0	0	0	0
P54578	USP14 Ubiquitin carboxyl-terminal hydrolase 14	USP14	0	0	0	0	0	0
P54819	AK2 Adenylate kinase 2, mitochondrial	AK2	0	0	0	0	0	0
P55795	HNRNPH2 Heterogeneous nuclear ribonucleoprotein H2	HNRNPH2	0	0	0	0	0	0
P60900	PSMA6 Proteasome subunit alpha type-6	PSMA6	0	0	0	0	0	0
P60953	CDC42 Cell division control protein 42 homolog	CDC42	0	0	0	0	0	0
P62136	PPP1CA Serine/threonine-protein phosphatase PP1-alpha cat	PPP1CA	0	0	0	0	0	0
P62140	PPP1CB Serine/threonine-protein phosphatase PP1-beta cata	PPP1CB	0	0	0	0	0	0
P62873	GNB1 Guanine nucleotide-binding protein G(I)/G(S)/G(T)	GNB1	0	0	0	0	0	0
P63151	PPP2R2A Serine/threonine-protein phosphatase 2A 55 kDa reg	PPP2R2A	0	0	0	0	0	0
P67775	PPP2CA Serine/threonine-protein phosphatase 2A catalytic	PPP2CA	0	0	0	0	0	0
P80303	NUCB2 Nucleobindin-2	NUCB2	0	0	0	0	0	0
Q00005	PPP2R2B Serine/threonine-protein phosphatase 2A 55 kDa reg	PPP2R2B	0	0	0	0	0	0
Q01081	U2AF1 Splicing factor U2AF 35 kDa subunit	U2AF1	0	0	0	0	0	0
Q02218	OGDH 2-oxoglutarate dehydrogenase, mitochondrial	OGDH	0	0	0	0	0	0
Q05513	PRKCZ Protein kinase C zeta type	PRKCZ	0	0	0	0	0	0
Q07020	RPL18 60S ribosomal protein L18	RPL18	0	0	0	0	0	0
Q07283	TCHH Trichohyalin	TCHH	0	0	0	0	0	0
Q07837	SLC3A1 Neutral and basic amino acid transport protein rBA	SLC3A1	0	0	0	0	0	0
Q12873	CHD3 Chromodomain-helicase-DNA-binding protein 3	CHD3	0	0	0	0	0	0
Q12923	PTPN13 Tyrosine-protein phosphatase non-receptor type 13	PTPN13	0	0	0	0	0	0
Q12955	ANK3 Ankyrin-3	ANK3	0	0	0	0	0	0
Q13131	PRKAA1 5-AMP-activated protein kinase catalytic subunit	PRKAA1	0	0	0	0	0	0
Q13144	EIF2B5 Translation initiation factor eIF-2B subunit epsil	EIF2B5	0	0	0	0	0	0
Q13148	TARDBP TAR DNA-binding protein 43	TARDBP	0	0	0	0	0	0
Q13283	G3BP1 Ras GTPase-activating protein-binding protein 1	G3BP1	0	0	0	0	0	0
Q13362	PPP2R5C Serine/threonine-protein phosphatase 2A 56 kDa reg	PPP2R5C	0	0	0	0	0	0
Q13402	MYO7A Unconventional myosin-VIIa	MYO7A	0	0	0	0	0	0
Q13576	IQGAP2 Ras GTPase-activating-like protein IQGAP2	IQGAP2	0	0	0	0	0	0
Q13618	CUL3 Cullin-3	CUL3	0	0	0	0	0	0
Q13748	TUBA3D Tubulin alpha-3C/D chain	TUBA3D	0	0	0	0	0	0
Q14031	COL4A6 Collagen alpha-6(IV) chain	COL4A6	0	0	0	0	0	0
Q14240	EIF4A2 Eukaryotic initiation factor 4A-II	EIF4A2	0	0	0	0	0	0
Q14315	FLNC Filamin-C	FLNC	0	0	0	0	0	0
Q14789	GOLGB1 Golgin subfamily B member 1	GOLGB1	0	0	0	0	0	0
Q15046	KARS Lysine--tRNA ligase	KARS	0	0	0	0	0	0
Q15819	UBE2V2 Ubiquitin-conjugating enzyme E2 variant 2	UBE2V2	0	0	0	0	0	0
Q16401	PSMD5 26S proteasome non-ATPase regulatory subunit 5	PSMD5	0	0	0	0	0	0
Q16555	DPYSL2 Dihydropyrimidinase-related protein 2	DPYSL2	0	0	0	0	0	0
Q2Y0W8	SLC4A8 Electroneutral sodium bicarbonate exchanger 1	SLC4A8	0	0	0	0	0	0
Q32P51	HNRNPA1L2 Heterogeneous nuclear ribonucleoprotein A1-like 2	HNRNPA1L2	0	0	0	0	0	0
Q3ZCM7	TUBB8 Tubulin beta-8 chain	TUBB8	0	0	0	0	0	0
Q4VXU2	PABPC1L Polyadenylate-binding protein 1-like	PABPC1L	0	0	0	0	0	0
Q5H9R7	PPP6R3 Serine/threonine-protein phosphatase 6 regulatory	PPP6R3	0	0	0	0	0	0
Q5JWR5	DOPEY1 Protein dopey-1	DOPEY1	0	0	0	0	0	0
Q5XKE5	KRT79 Keratin, type II cytoskeletal 79	KRT79	0	0	0	0	0	0
Q66PJ3	ARL6IP4 ADP-ribosylation factor-like protein 6-interacting	ARL6IP4	0	0	0	0	0	0
Q6IA69	NADSYN1 Glutamine-dependent NAD(+) synthetase	NADSYN1	0	0	0	0	0	0
Q6IN85	SMEK1 Serine/threonine-protein phosphatase 4 regulatory	SMEK1	0	0	0	0	0	0
Q6KB66	KRT80 Keratin, type II cytoskeletal 80	KRT80	0	0	0	0	0	0
Q6PKG0	LARP1 La-related protein 1	LARP1	0	0	0	0	0	0
Q6ZRQ5	MMS22L Protein MMS22-like	MMS22L	0	0	0	0	0	0
Q70CQ2	USP34 Ubiquitin carboxyl-terminal hydrolase 34	USP34	0	0	0	0	0	0
Q7Z2Z2	EFTUD1 Elongation factor Tu GTP-binding domain-containing	EFTUD1	0	0	0	0	0	0
Q86XH1	IQCA1 IQ and AAA domain-containing protein 1	IQCA1	0	0	0	0	0	0
Q86Y46	KRT73 Keratin, type II cytoskeletal 73	KRT73	0	0	0	0	0	0
Q8N1N4	KRT78 Keratin, type II cytoskeletal 78	KRT78	0	0	0	0	0	0
Q8N201	INTS1 Integrator complex subunit 1	INTS1	0	0	0	0	0	0
Q8N335	GPD1L Glycerol-3-phosphate dehydrogenase 1-like protein	GPD1L	0	0	0	0	0	0
Q8NDA8	HEATR7A HEAT repeat-containing protein 7A	HEATR7A	0	0	0	0	0	0
Q8TF72	SHROOM3 Protein Shroom3	SHROOM3	0	0	0	0	0	0
Q8WZ42	TTN Titin	TTN	0	0	0	0	0	0
Q96C36	PYCR2 Pyrroline-5-carboxylate reductase 2	PYCR2	0	0	0	0	0	0
Q96CM8	ACSF2 Acyl-CoA synthetase family member 2, mitochondrial	ACSF2	0	0	0	0	0	0
Q96EE3	SEH1L Nucleoporin SEH1	SEH1L	0	0	0	0	0	0
Q96F07	CYFIP2 Cytoplasmic FMR1-interacting protein 2	CYFIP2	0	0	0	0	0	0
Q96HP0	DOCK6 Dedicator of cytokinesis protein 6	DOCK6	0	0	0	0	0	0
Q96ME1	FBXL18 F-box/LRR-repeat protein 18	FBXL18	0	0	0	0	0	0
Q96QA5	GSDMA Gasdermin-A	GSDMA	0	0	0	0	0	0
Q96QV6	HIST1H2AA Histone H2A type 1-A	HIST1H2AA	0	0	0	0	0	0
Q96TA1	FAM129B Niban-like protein 1	FAM129B	0	0	0	0	0	0
Q9BQ52	ELAC2 Zinc phosphodiesterase ELAC protein 2	ELAC2	0	0	0	0	0	0
Q9BXP5	SRRT Serrate RNA effector molecule homolog	SRRT	0	0	0	0	0	0
Q9NR09	BIRC6 Baculoviral IAP repeat-containing protein 6	BIRC6	0	0	0	0	0	0
Q9NSI6	BRWD1 Bromodomain and WD repeat-containing protein 1	BRWD1	0	0	0	0	0	0
Q9NVS9	PNPO Pyridoxine-5-phosphate oxidase	PNPO	0	0	0	0	0	0
Q9NY33	DPP3 Dipeptidyl peptidase 3	DPP3	0	0	0	0	0	0
Q9NYY3	PLK2 Serine/threonine-protein kinase PLK2	PLK2	0	0	0	0	0	0
Q9UBT7	CTNNAL1 Alpha-catulin	CTNNAL1	0	0	0	0	0	0
Q9UEW8	STK39 STE20/SPS1-related proline-alanine-rich protein ki	STK39	0	0	0	0	0	0
Q9UIA9	XPO7 Exportin-7	XPO7	0	0	0	0	0	0
Q9ULC4	MCTS1 Malignant T-cell-amplified sequence 1	MCTS1	0	0	0	0	0	0
Q9ULJ7	ANKRD50 Ankyrin repeat domain-containing protein 50	ANKRD50	0	0	0	0	0	0
Q9Y2V2	CARHSP1 Calcium-regulated heat stable protein 1	CARHSP1	0	0	0	0	0	0
Q9Y4E8	USP15 Ubiquitin carboxyl-terminal hydrolase 15	USP15	0	0	0	0	0	0
Q9Y520	PRRC2C Protein PRRC2C	PRRC2C	0	0	0	0	0	0
Reverse_A7E2Y1	MYH7B Myosin-7B	MYH7B	0	0	0	0	0	0
Reverse_O14686	MLL2 Histone-lysine N-methyltransferase MLL2	MLL2	0	0	0	0	0	0
Reverse_O15371	EIF3D Eukaryotic translation initiation factor 3 subunit	EIF3D	0	0	0	0	0	0
Reverse_O43312	MTSS1 Metastasis suppressor protein 1	MTSS1	0	0	0	0	0	0
Reverse_O75151	PHF2 Lysine-specific demethylase PHF2	PHF2	0	0	0	0	0	0
Reverse_O75509	TNFRSF21 Tumor necrosis factor receptor superfamily member	TNFRSF21	0	0	0	0	0	0
Reverse_O95197	RTN3 Reticulon-3	RTN3	0	0	0	0	0	0
Reverse_O95613	PCNT Pericentrin	PCNT	0	0	0	0	0	0
Reverse_P00439	PAH Phenylalanine-4-hydroxylase	PAH	0	0	0	0	0	0
Reverse_P0C671	C6orf222 Uncharacterized protein C6orf222	C6orf222	0	0	0	0	0	0
Reverse_P12532	CKMT1B Creatine kinase U-type, mitochondrial	CKMT1B	0	0	0	0	0	0
Reverse_P16401	HIST1H1B Histone H1.5	HIST1H1B	0	0	0	0	0	0
Reverse_P31629	HIVEP2 Transcription factor HIVEP2	HIVEP2	0	0	0	0	0	0
Reverse_P35579	MYH9 Myosin-9	MYH9	0	0	0	0	0	0
Reverse_P50914	RPL14 60S ribosomal protein L14	RPL14	0	0	0	0	0	0
Reverse_P98161	PKD1 Polycystin-1	PKD1	0	0	0	0	0	0
Reverse_Q09428	ABCC8 ATP-binding cassette sub-family C member 8	ABCC8	0	0	0	0	0	0
Reverse_Q14980	NUMA1 Nuclear mitotic apparatus protein 1	NUMA1	0	0	0	0	0	0
Reverse_Q4L180	FILIP1L Filamin A-interacting protein 1-like	FILIP1L	0	0	0	0	0	0
Reverse_Q5U4N7	GDF5OS Protein GDF5OS, mitochondrial	GDF5OS	0	0	0	0	0	0
Reverse_Q5VT06	CEP350 Centrosome-associated protein 350	CEP350	0	0	0	0	0	0
Reverse_Q68DA7	FMN1 Formin-1	FMN1	0	0	0	0	0	0
Reverse_Q6R327	RICTOR Rapamycin-insensitive companion of mTOR	RICTOR	0	0	0	0	0	0
Reverse_Q8IUX8	EGFL6 Epidermal growth factor-like protein 6	EGFL6	0	0	0	0	0	0
Reverse_Q8IVF4	DNAH10 Dynein heavy chain 10, axonemal	DNAH10	0	0	0	0	0	0
Reverse_Q8IWU5	SULF2 Extracellular sulfatase Sulf-2	SULF2	0	0	0	0	0	0
Reverse_Q8IZT6	ASPM Abnormal spindle-like microcephaly-associated prot	ASPM	0	0	0	0	0	0
Reverse_Q8N9J4	cDNA FLJ37045 fis, clone BRACE2012185	cDNA	0	0	0	0	0	0
Reverse_Q8WZ42	TTN Titin	TTN	0	0	0	0	0	0
Reverse_Q92752	TNR Tenascin-R	TNR	0	0	0	0	0	0
Reverse_Q9NZM1	MYOF Myoferlin	MYOF	0	0	0	0	0	0
Reverse_Q9UGU0	TCF20 Transcription factor 20	TCF20	0	0	0	0	0	0
Reverse_Q9ULG1	INO80 DNA helicase INO80	INO80	0	0	0	0	0	0

## Sheet: allProteins
					SILAC ratios
ID	protein	description	subcelluarLoc	Panther_category	all_for_avg	all_rev_avg	unique_for_avg	unique_rev_avg	met_control	met_o_control
Q01469	FABP5	FABP5 Fatty acid-binding protein, epidermal	cytoplasm	no_panther_category	20	20	20	20	20	20
P08107	HSPA1B	HSPA1B Heat shock 70 kDa protein 1A/1B	cytoplasm	no_panther_category	13.275	0.185	12.535	0.185	1.28	1.16
Q53FA3	HSPA1L	HSPA1L Heat shock 70kDa protein 1-like variant	no annotated location	no_panther_category	13.185	0.915	0	0	1.2	1.32
P11142	HSPA8	HSPA8 Heat shock cognate 71 kDa protein	cytoplasm/cytoskeleton/nucleus/cell membrane/membrane/cytoplasmic vesicle/lysosome/endosome/endoplasmic reticulum/golgi/secreted/mitochondrion	no_panther_category	8.645	0.25	10.36	0.24	1.37	1.22
P49748	ACADVL	ACADVL Very long-chain specific acyl-CoA dehydrogenase, m	membrane/mitochondrion	dehydrogenase(PC00176);oxidase(PC00092);transferase(PC00175)	5.325	0.855	5.325	0.855	0	0
Q9BR76	CORO1B	CORO1B Coronin-1B	cytoplasm/cytoskeleton/membrane/nucleus	non-motor actin binding protein(PC00085)	4.93	1.595	4.93	1.595	1.28	1.21
P54652	HSPA2	HSPA2 Heat shock-related 70 kDa protein 2	cytoplasm/cytoskeleton	no_panther_category	4.66	0.325	0	0	1.42	1.22
Q5VYK3	ECM29	ECM29 Proteasome-associated protein ECM29 homolog	membrane/cytoplasm/cytoplasmic vesicle/endoplasmic reticulum/golgi/cytoskeleton/endosome/nucleus	kinase modulator(PC00095)	4.43	5.905	4.43	5.905	0	1.12
P34896	SHMT1	SHMT1 Serine hydroxymethyltransferase, cytosolic	cytoplasm/nucleus	methyltransferase(PC00220)	3.21	1.17	0	0	1.17	0.81
Q5JRX3	PITRM1	PITRM1 Presequence protease, mitochondrial	mitochondrion	metalloprotease(PC00121)	2.425	0.46	2.425	0.46	1.05	0.84
P52272	HNRNPM	HNRNPM Heterogeneous nuclear ribonucleoprotein M	cytoplasm/cytoskeleton/golgi/nucleus	ribonucleoprotein(PC00171)	2.315	0.37	2.315	0.37	0.91	0.68
P11021	HSPA5	HSPA5 78 kDa glucose-regulated protein	cell membrane/membrane/cytoplasm/nucleus/endoplasmic reticulum/secreted/mitochondrion	no_panther_category	2.185	0.695	2.17	0.695	1.1	0.98
P62158	CALM3	CALM3 Calmodulin	cell membrane/membrane/cytoplasm/cytoplasmic vesicle/nucleus/cytoskeleton/secreted/endosome/endoplasmic reticulum/golgi	NA	2.04	1.265	2.04	1.265	1.39	1.23
P55263	ADK	ADK Adenosine kinase	cytoplasm/nucleus	carbohydrate kinase(PC00220);nucleotide kinase(PC00137)	1.71	1.145	1.71	1.145	1.5	1.12
P04792	HSPB1	HSPB1 Heat shock protein beta-1	cytoplasm/endoplasmic reticulum/secreted/nucleus/cell membrane/membrane/endosome/golgi/cytoskeleton/mitochondrion/cytoplasmic vesicle	chaperone(PC00072)	1.705	1.53	1.705	1.53	1.63	1.21
P37802	TAGLN2	TAGLN2 Transgelin-2	cytoplasm/cytoskeleton	non-motor actin binding protein(PC00085)	1.695	1.195	1.695	1.195	1.44	1.4
P38646	HSPA9	HSPA9 Stress-70 protein, mitochondrial	cell membrane/membrane/endosome/endoplasmic reticulum/golgi/nucleus/secreted/mitochondrion/cytoplasm	no_panther_category	1.66	0.755	1.66	0.755	0.99	0.89
O00763	ACACB	ACACB Acetyl-CoA carboxylase 2	membrane/mitochondrion/nucleus/cytoplasm	ligase(PC00142)	1.62	1.325	1.725	1.41	1.72	1.44
P62140	PPP1CB	PPP1CB Serine/threonine-protein phosphatase PP1-beta cata	cytoplasm/nucleus/cell membrane/membrane	calcium-binding protein(PC00060);protein phosphatase(PC00121)	1.595	1.63	0	0	1.38	1.1
P43251	BTD	BTD Biotinidase	secreted	hydrolase(PC00121)	1.585	1.375	1.585	1.375	1.54	1.52
Q14697	GANAB	GANAB Neutral alpha-glucosidase AB	endoplasmic reticulum/golgi	glucosidase(PC00121)	1.575	1.055	1.575	1.055	1.38	1
Q96QV6	HIST1H2AA	HIST1H2AA Histone H2A type 1-A	nucleus	histone(PC00171)	1.57	1.425	0	0	0	1.41
P15924	DSP	DSP Desmoplakin	cell membrane/membrane/cytoplasm/cytoskeleton/nucleus	non-motor actin binding protein(PC00085)	1.565	4.725	1.565	4.725	1.67	1.46
P48147	PREP	PREP Prolyl endopeptidase	membrane/cytoplasm/cytoskeleton/nucleus	serine protease(PC00121)	1.565	0.965	1.565	0.965	1.16	0.89
P0C0S5	H2AFZ	H2AFZ Histone H2A.Z	nucleus	no_panther_category	1.56	1.425	0	0	0	1.41
P0C0S8	HIST1H2AM	HIST1H2AM Histone H2A type 1	cytoplasm/nucleus/cytoplasmic vesicle/secreted	NA	1.56	1.425	0	0	0	1.41
P16104	H2AFX	H2AFX Histone H2A.x	membrane/cytoplasm/mitochondrion/nucleus/cytoskeleton	histone(PC00171)	1.56	1.425	0	0	0	1.41
Q16777	HIST2H2AC	HIST2H2AC Histone H2A type 2-C	nucleus	histone(PC00171)	1.56	1.425	0	0	0	1.41
Q71UI9	H2AFV	H2AFV Histone H2A.V	nucleus	no_panther_category	1.56	1.425	0	0	0	1.41
Q7L7L0	HIST3H2A	HIST3H2A Histone H2A type 3	nucleus	histone(PC00171)	1.56	1.425	0	0	0	1.41
Q9BTM1	H2AFJ	H2AFJ Histone H2A.J	nucleus	histone(PC00171)	1.56	1.425	0	0	0	1.41
Q9H993	C6orf211	C6orf211 UPF0364 protein C6orf211	no annotated location	no_panther_category	1.55	1.395	1.55	1.395	1.46	1.14
P27797	CALR	CALR Calreticulin	membrane/cytoplasm/endosome/endoplasmic reticulum/golgi/lysosome/nucleus/secreted/cytoskeleton/cytoplasmic vesicle	calcium-binding protein(PC00060)	1.54	2.035	1.54	2.035	0.99	0.95
P07237	P4HB	P4HB Protein disulfide-isomerase	membrane/endoplasmic reticulum/cell membrane/secreted/cytoplasm	no_panther_category	1.535	1.515	1.535	1.515	1.21	1.13
P40939	HADHA	HADHA Trifunctional enzyme subunit alpha, mitochondrial	mitochondrion/membrane/cytoplasm/cytoskeleton/cytoplasmic vesicle/golgi/endoplasmic reticulum	dehydrogenase(PC00176);epimerase/racemase(PC00092);hydratase(PC00135)	1.535	0.87	1.535	0.87	0	1.04
P04075	ALDOA	ALDOA Fructose-bisphosphate aldolase A	cytoplasm/secreted/nucleus	no_panther_category	1.515	1.315	1.525	1.315	1.53	1.36
P11498	PC	PC Pyruvate carboxylase, mitochondrial	cell membrane/membrane/cytoplasm/endoplasmic reticulum/mitochondrion/nucleus/secreted	ligase(PC00142)	1.515	1.24	1.515	1.24	1.55	1.35
Q13085	ACACA	ACACA Acetyl-CoA carboxylase 1	cytoplasm/lysosome/secreted/nucleus/membrane/mitochondrion	ligase(PC00142)	1.51	1.28	1.505	1.275	1.63	1.39
P33993	MCM7	MCM7 DNA replication licensing factor MCM7	cytoplasm/nucleus/endosome/membrane/cytoskeleton/golgi/cell membrane/cytoplasmic vesicle/endoplasmic reticulum	DNA helicase(PC00171);hydrolase(PC00009)	1.505	1.19	1.505	1.19	1.33	1.15
P55786	NPEPPS	NPEPPS Puromycin-sensitive aminopeptidase	cytoplasm/nucleus	no_panther_category	1.5	1.13	1.5	1.13	1.15	1.08
P62714	PPP2CB	PPP2CB Serine/threonine-protein phosphatase 2A catalytic	cytoplasm/nucleus/cytoskeleton	calcium-binding protein(PC00060);protein phosphatase(PC00121)	1.485	1.31	0	0	1.71	1.09
P67775	PPP2CA	PPP2CA Serine/threonine-protein phosphatase 2A catalytic	cytoplasm/nucleus/cell membrane/membrane/endoplasmic reticulum/cytoskeleton	calcium-binding protein(PC00060);protein phosphatase(PC00121)	1.485	1.31	0	0	1.71	1.09
P09467	FBP1	FBP1 Fructose-1,6-bisphosphatase 1	cytoplasm/nucleus	carbohydrate phosphatase(PC00121)	1.455	1.505	1.455	1.505	2.08	1.1
Q10713	PMPCA	PMPCA Mitochondrial-processing peptidase subunit alpha	mitochondrion	metalloprotease(PC00121)	1.455	1.235	1.455	1.235	1.1	0
P14174	MIF	MIF Macrophage migration inhibitory factor	membrane/cytoplasm/mitochondrion/secreted	no_panther_category	1.44	1.26	1.44	1.26	1.52	1.24
Q13200	PSMD2	PSMD2 26S proteasome non-ATPase regulatory subunit 2	membrane/cytoplasm/nucleus/endoplasmic reticulum	enzyme modulator(PC00095)	1.435	1.38	1.435	1.38	1.34	1.23
O60361	NME2P1	NME2P1 Putative nucleoside diphosphate kinase	no annotated location	no_panther_category	1.42	1.495	0	0	1.72	0
P22392	NME2	NME2 Nucleoside diphosphate kinase B	cell membrane/membrane/cytoplasm/cytoskeleton/nucleus	no_panther_category	1.42	1.29	1.475	1.205	1.61	1.17
P50395	GDI2	GDI2 Rab GDP dissociation inhibitor beta	membrane/cytoplasm/cytoplasmic vesicle/endosome/endoplasmic reticulum/golgi	G-protein modulator(PC00095);acyltransferase(PC00022)	1.42	1.315	1.405	1.39	1.44	1.25
Q14204	DYNC1H1	DYNC1H1 Cytoplasmic dynein 1 heavy chain 1	cell membrane/membrane/cytoplasm/cytoskeleton/nucleus/endoplasmic reticulum/golgi	hydrolase(PC00121);microtubule binding motor protein(PC00085)	1.41	1.3	1.41	1.3	1.27	1.1
Q96T76	MMS19	MMS19 MMS19 nucleotide excision repair protein homolog	cytoplasm/cytoskeleton/nucleus	nucleic acid binding(PC00171);transcription cofactor(PC00218)	1.41	1.645	1.41	1.645	1.27	1.02
Q9BUF5	TUBB6	TUBB6 Tubulin beta-6 chain	cytoplasm/cytoskeleton	tubulin(PC00085)	1.405	1.32	1.415	1.13	1.36	1.1
H7C469	Uncharacterized	Uncharacterized protein	no annotated location	aspartic protease(PC00121)	1.395	1.295	0	0	1.2	1.04
P06744	GPI	GPI Glucose-6-phosphate isomerase	cytoplasm/secreted	isomerase(PC00135)	1.39	1.075	1.39	1.075	1.36	1.06
P31150	GDI1	GDI1 Rab GDP dissociation inhibitor alpha	cytoplasm/golgi/membrane/cytoplasmic vesicle/endosome/endoplasmic reticulum	G-protein modulator(PC00095);acyltransferase(PC00022)	1.39	1.47	0	0	1.73	1.02
P15531	NME1	NME1 Nucleoside diphosphate kinase A	cell membrane/membrane/cytoplasm/endoplasmic reticulum/nucleus/mitochondrion	no_panther_category	1.38	1.335	1.405	1.365	1.51	0
P49915	GMPS	GMPS GMP synthase	cytoplasm	glycosyltransferase(PC00220)	1.375	2.63	1.375	2.63	0	20
P07339	CTSD	CTSD Cathepsin D	membrane/cytoplasm/endosome/endoplasmic reticulum/golgi/lysosome/nucleus/secreted	aspartic protease(PC00121)	1.365	1.315	0	0	1.21	1.04
P07737	PFN1	PFN1 Profilin-1	cytoplasm/cytoskeleton/nucleus/membrane	no_panther_category	1.365	1.18	1.365	1.18	1.43	1.08
P22314	UBA1	UBA1 Ubiquitin-like modifier-activating enzyme 1	cytoplasm/cytoskeleton/mitochondrion/nucleus	ligase(PC00142);transfer/carrier protein(PC00219)	1.365	1.355	1.365	1.355	1.38	1.3
P53621	COPA	COPA Coatomer subunit alpha	membrane/cytoplasm/cytoplasmic vesicle/golgi/secreted	vesicle coat protein(PC00150)	1.36	1.46	1.36	1.46	1.15	1.12
P45984	MAPK9	MAPK9 Mitogen-activated protein kinase 9	cell membrane/membrane/cytoplasm/cytoplasmic vesicle/nucleus/mitochondrion/cytoskeleton	non-receptor serine/threonine protein kinase(PC00220)	1.355	10.37	0	0	0	1.1
P07814	EPRS	EPRS Bifunctional glutamate/proline--tRNA ligase	cytoplasm	ligase(PC00142)	1.345	7.75	1.345	7.75	0	1.37
Q92616	GCN1L1	GCN1L1 Translational activator GCN1	cytoplasm	kinase modulator(PC00095)	1.345	1.605	1.345	1.605	1.25	1.04
Q13509	TUBB3	TUBB3 Tubulin beta-3 chain	cytoplasm/cytoskeleton/nucleus	tubulin(PC00085)	1.34	1.39	1.205	1.015	1.38	1.07
P27708	CAD	CAD CAD protein	cytoplasm/nucleus	ligase(PC00142);transferase(PC00220)	1.335	5.98	1.335	5.98	1.44	1.19
P50748	KNTC1	KNTC1 Kinetochore-associated protein 1	cytoplasm/cytoskeleton/nucleus	no_panther_category	1.315	1.56	1.315	1.56	1.39	1.22
O95373	IPO7	IPO7 Importin-7	cytoplasm/nucleus	small GTPase(PC00095);transporter(PC00020)	1.305	1.825	1.305	1.825	1.39	1.24
P18669	PGAM1	PGAM1 Phosphoglycerate mutase 1	nucleus	no_panther_category	1.305	1.435	0	0	1.39	1.32
P60842	EIF4A1	EIF4A1 Eukaryotic initiation factor 4A-I	cytoplasm/nucleus	RNA helicase(PC00171)	1.3	1.12	0	0	1.58	0
P68371	TUBB4B	TUBB4B Tubulin beta-4B chain	cytoplasm/cytoskeleton	tubulin(PC00085)	1.3	1.345	2.01	2.075	1.26	1.07
P06748	NPM1	NPM1 Nucleophosmin	cytoplasm/nucleus/mitochondrion/cytoskeleton/membrane/cell membrane/endoplasmic reticulum	chaperone(PC00072)	1.295	1.77	1.295	1.77	0	1.15
Q3ZCM7	TUBB8	TUBB8 Tubulin beta-8 chain	cytoplasm/cytoskeleton	tubulin(PC00085)	1.295	1.465	0	0	1.4	1.06
O75439	PMPCB	PMPCB Mitochondrial-processing peptidase subunit beta	mitochondrion	metalloprotease(PC00121)	1.29	1.37	1.29	1.37	1.7	0.59
P60174	TPI1	TPI1 Triosephosphate isomerase	nucleus/cytoplasm/cytoskeleton	no_panther_category	1.29	1.475	1.29	1.475	1.32	1.37
P07437	TUBB	TUBB Tubulin beta chain	nucleus/membrane/cytoplasm/cytoplasmic vesicle/endosome/endoplasmic reticulum/golgi/lysosome/mitochondrion/cytoskeleton	tubulin(PC00085)	1.285	1.34	1.24	1.635	1.28	1.13
Q00839	HNRNPU	HNRNPU Heterogeneous nuclear ribonucleoprotein U	cytoplasm/nucleus/membrane/cytoskeleton/cytoplasmic vesicle	no_panther_category	1.285	2.305	1.285	2.305	1.65	1.11
Q13748	TUBA3D	TUBA3D Tubulin alpha-3C/D chain	cytoplasm/cytoskeleton	NA	1.28	1.535	0	0	1.29	1.11
P05165	PCCA	PCCA Propionyl-CoA carboxylase alpha chain, mitochondri	mitochondrion	ligase(PC00142)	1.275	1.035	1.285	1.07	1.36	1.16
Q9BVA1	TUBB2B	TUBB2B Tubulin beta-2B chain	membrane/cytoplasm/cytoskeleton	tubulin(PC00085)	1.275	1.36	0	0	1.25	1.07
P31939	ATIC	ATIC Bifunctional purine biosynthesis protein PURH	no annotated location	hydrolase(PC00121);methyltransferase(PC00220)	1.27	1.4	1.27	1.4	1.48	1.08
Q8TEX9	IPO4	IPO4 Importin-4	cytoplasm/nucleus	transfer/carrier protein(PC00219);transporter(PC00227)	1.27	1.94	1.27	1.94	1.52	1.24
Q9Y678	COPG1	COPG1 Coatomer subunit gamma-1	membrane/cytoplasm/cytoplasmic vesicle/golgi/endoplasmic reticulum/nucleus	vesicle coat protein(PC00150)	1.27	1.355	1.27	1.355	1.23	1.02
P08238	HSP90AB1	HSP90AB1 Heat shock protein HSP 90-beta	cytoplasm/nucleus/cell membrane/membrane/endosome/endoplasmic reticulum/cytoskeleton/golgi/secreted/mitochondrion/cytoplasmic vesicle	Hsp90 family chaperone(PC00072)	1.265	1.365	1.31	1.375	1.38	1.03
P11940	PABPC1	PABPC1 Polyadenylate-binding protein 1	cytoplasm/membrane/mitochondrion/nucleus	no_panther_category	1.265	1.755	0	0	1.68	1.23
Q96RQ3	MCCC1	MCCC1 Methylcrotonoyl-CoA carboxylase subunit alpha, mit	mitochondrion	ligase(PC00142)	1.265	1.065	1.275	1.08	1.32	1.23
O75533	SF3B1	SF3B1 Splicing factor 3B subunit 1	cytoplasm/nucleus	mRNA splicing factor(PC00171)	1.26	5.855	1.26	5.855	0	1.18
P22102	GART	GART Trifunctional purine biosynthetic protein adenosin	no annotated location	hydrolase(PC00121);ligase(PC00142);transferase(PC00220)	1.26	2.075	1.26	2.075	1.48	0
Q16719	KYNU	KYNU Kynureninase	cytoplasm	hydrolase(PC00121)	1.26	1.275	1.26	1.275	0	1.24
Q71U36	TUBA1A	TUBA1A Tubulin alpha-1A chain	cell membrane/membrane/cytoplasm/cytoskeleton/endosome/endoplasmic reticulum/golgi/nucleus/secreted	tubulin(PC00085)	1.26	1.555	0	0	1.32	1.08
P27348	YWHAQ	YWHAQ 14-3-3 protein theta	cytoplasm/membrane/cell membrane/cytoplasmic vesicle/nucleus/endosome/endoplasmic reticulum/golgi/secreted/cytoskeleton/lysosome/mitochondrion	chaperone(PC00072)	1.255	1.48	0	0	1.27	1.04
P35579	MYH9	MYH9 Myosin-9	cell membrane/membrane/endosome/lysosome/cytoplasm/golgi/nucleus/cytoskeleton	G-protein modulator(PC00095);actin binding motor protein(PC00022);cell junction protein(PC00085)	1.255	1.485	1.175	1.47	1.31	0.95
P52895	AKR1C2	AKR1C2 Aldo-keto reductase family 1 member C2	cytoplasm	reductase(PC00176)	1.255	1.2	1.01	1.09	1.21	1.33
Q6AI08	HEATR6	HEATR6 HEAT repeat-containing protein 6	no annotated location	major histocompatibility complex antigen(PC00090)	1.255	1.69	1.255	1.69	1.27	1.28
Q562R1	ACTBL2	ACTBL2 Beta-actin-like protein 2	cytoplasm/cytoskeleton	actin and actin related protein(PC00085)	1.25	1.71	0	0	1.47	0.98
P17980	PSMC3	PSMC3 26S protease regulatory subunit 6A	endosome/nucleus/cytoplasm	hydrolase(PC00121)	1.245	1.265	1.245	1.265	1.52	0
Q09161	NCBP1	NCBP1 Nuclear cap-binding protein subunit 1	cytoplasm/nucleus	mRNA splicing factor(PC00171)	1.245	1.68	1.245	1.68	0	0
Q9NY65	TUBA8	TUBA8 Tubulin alpha-8 chain	cytoplasm/cytoskeleton	tubulin(PC00085)	1.245	1.56	0	0	1.33	1.07
P33992	MCM5	MCM5 DNA replication licensing factor MCM5	nucleus	DNA helicase(PC00171);hydrolase(PC00009)	1.24	1.245	1.24	1.245	1.36	0.99
Q96D46	NMD3	NMD3 60S ribosomal export protein NMD3	cytoplasm/nucleus	no_panther_category	1.24	1.785	1.24	1.785	1.34	1.44
O75390	CS	CS Citrate synthase, mitochondrial	mitochondrion	lyase(PC00144);transferase(PC00220)	1.235	1.16	1.235	1.16	1.21	0.93
P00558	PGK1	PGK1 Phosphoglycerate kinase 1	membrane/cytoplasm/cytoskeleton/nucleus	carbohydrate kinase(PC00220)	1.235	1.96	1.265	1.96	1.58	1.19
P54727	RAD23B	RAD23B UV excision repair protein RAD23 homolog B	cytoplasm/nucleus	damaged DNA-binding protein(PC00171)	1.235	1.695	1.235	1.695	1.45	0
P68366	TUBA4A	TUBA4A Tubulin alpha-4A chain	membrane/cytoplasm/cytoskeleton/cytoplasmic vesicle	tubulin(PC00085)	1.23	1.525	1.155	1.385	1.32	1.06
P48643	CCT5	CCT5 T-complex protein 1 subunit epsilon	cytoplasm/cytoskeleton	chaperonin(PC00072)	1.225	1.85	1.225	1.85	1.47	1.43
P49588	AARS	AARS Alanine--tRNA ligase, cytoplasmic	cytoplasm	RNA binding protein(PC00171)	1.225	1.28	1.225	1.28	1.25	1.17
P26639	TARS	TARS Threonine--tRNA ligase, cytoplasmic	cytoplasm	ligase(PC00142)	1.22	1.46	5.89	1.485	1.29	1.09
P43686	PSMC4	PSMC4 26S protease regulatory subunit 6B	cytoplasm/nucleus/membrane	hydrolase(PC00121)	1.22	10.75	1.22	10.75	1.23	0
Q9BSJ8	ESYT1	ESYT1 Extended synaptotagmin-1	cell membrane/membrane/endoplasmic reticulum	no_panther_category	1.22	2.17	1.22	2.17	1.37	1.21
P15259	PGAM2	PGAM2 Phosphoglycerate mutase 2	no annotated location	no_panther_category	1.215	1.285	0	0	1.3	1.32
P55084	HADHB	HADHB Trifunctional enzyme subunit beta, mitochondrial	membrane/endoplasmic reticulum/mitochondrion/cytoplasm/cytoskeleton/cytoplasmic vesicle/golgi	acetyltransferase(PC00220)	1.215	0.94	1.215	0.94	1.04	0
Q06210	GFPT1	GFPT1 Glucosamine--fructose-6-phosphate aminotransferase	no annotated location	transaminase(PC00220)	1.215	1.73	1.215	1.73	1.28	1.19
P35580	MYH10	MYH10 Myosin-10	no annotated location	G-protein modulator(PC00095);actin binding motor protein(PC00022);cell junction protein(PC00085)	1.21	1.31	0	0	1.23	0
P51570	GALK1	GALK1 Galactokinase	no annotated location	carbohydrate kinase(PC00220)	1.21	1.505	1.21	1.505	1.37	0
P23528	CFL1	CFL1 Cofilin-1	cytoplasm/cytoskeleton/nucleus/membrane/cell membrane/endosome/endoplasmic reticulum/golgi	non-motor actin binding protein(PC00085)	1.205	1.925	1.1	1.885	1.42	1.62
P31946	YWHAB	YWHAB 14-3-3 protein beta/alpha	cytoplasm/membrane/cell membrane/nucleus/cytoskeleton/cytoplasmic vesicle/endosome/endoplasmic reticulum/golgi/lysosome/mitochondrion	chaperone(PC00072)	1.205	1.515	0	0	1.27	1.2
P34932	HSPA4	HSPA4 Heat shock 70 kDa protein 4	membrane/cytoplasm/cytoskeleton/nucleus/cytoplasmic vesicle/endoplasmic reticulum/golgi	no_panther_category	1.205	1.555	5.92	1.52	1.34	1.13
P61981	YWHAG	YWHAG 14-3-3 protein gamma	cytoplasm/cytoskeleton/nucleus/membrane/cytoplasmic vesicle/endosome/endoplasmic reticulum/golgi/lysosome/mitochondrion/cell membrane	chaperone(PC00072)	1.205	1.46	0	0	1.21	0.92
P62258	YWHAE	YWHAE 14-3-3 protein epsilon	cytoplasm/nucleus/cell membrane/membrane/cytoplasmic vesicle/endosome/endoplasmic reticulum/golgi/lysosome/mitochondrion/secreted	chaperone(PC00072)	1.205	1.48	0	0	1.32	0.99
Q99832	CCT7	CCT7 T-complex protein 1 subunit eta	cytoplasm	chaperonin(PC00072)	1.195	1.865	1.195	1.865	1.51	1.23
P52701	MSH6	MSH6 DNA mismatch repair protein Msh6	nucleus	DNA binding protein(PC00171)	1.19	1.7	1.19	1.7	1.32	1.25
Q14839	CHD4	CHD4 Chromodomain-helicase-DNA-binding protein 4	cytoplasm/cytoskeleton/nucleus	DNA helicase(PC00171)	1.19	1.455	0	0	0.99	0
P61160	ACTR2	ACTR2 Actin-related protein 2	cytoplasm/cytoskeleton	no_panther_category	1.185	2.06	1.185	2.06	1.72	1.69
P12814	ACTN1	ACTN1 Alpha-actinin-1	cell membrane/membrane/cytoplasm/cytoskeleton/nucleus/endoplasmic reticulum/endosome/mitochondrion/secreted	non-motor actin binding protein(PC00085)	1.18	1.385	0	0	1.34	1.09
P06576	ATP5B	ATP5B ATP synthase subunit beta, mitochondrial	cytoplasm/membrane/mitochondrion	ATP synthase(PC00227);DNA binding protein(PC00068);anion channel(PC00002);ligand-gated ion channel(PC00171)	1.175	1.305	1.175	1.305	1.28	1.06
P06733	ENO1	ENO1 Alpha-enolase	cytoplasm/cell membrane/membrane/nucleus/secreted/endosome	lyase(PC00144)	1.175	1.34	1.175	1.29	1.28	1.13
P54136	RARS	RARS Arginine--tRNA ligase, cytoplasmic	cytoplasm	no_panther_category	1.175	1.78	1.175	1.78	1.42	1.12
P62191	PSMC1	PSMC1 26S protease regulatory subunit 4	nucleus/cytoplasm/membrane	hydrolase(PC00121)	1.175	0.935	1.175	0.935	0.9	0.54
Q9HAV4	XPO5	XPO5 Exportin-5	cytoplasm/nucleus	receptor(PC00197)	1.175	1.5	1.175	1.5	1.18	1.16
P14618	PKM	PKM Pyruvate kinase isozymes M1/M2	cell membrane/membrane/cytoplasm/cytoplasmic vesicle/nucleus/cytoskeleton/endoplasmic reticulum/mitochondrion/secreted	no_panther_category	1.17	1.495	1.17	1.495	1.45	1.12
P62873	GNB1	GNB1 Guanine nucleotide-binding protein G(I)/G(S)/G(T)	cytoplasm	heterotrimeric G-protein(PC00095);hydrolase(PC00020)	1.17	1.48	0	0	1.41	1.17
P62879	GNB2	GNB2 Guanine nucleotide-binding protein G(I)/G(S)/G(T)	cytoplasm	heterotrimeric G-protein(PC00095);hydrolase(PC00020)	1.17	1.58	0	0	1.32	1.17
Q16836	HADH	HADH Hydroxyacyl-coenzyme A dehydrogenase, mitochondria	mitochondrion	dehydrogenase(PC00176);epimerase/racemase(PC00092);hydratase(PC00135)	1.17	1.84	1.17	1.84	1.39	1.04
P31948	STIP1	STIP1 Stress-induced-phosphoprotein 1	nucleus/cytoplasm/cell membrane/membrane/endosome/endoplasmic reticulum/golgi/secreted	chaperone(PC00072)	1.165	1.31	1.165	1.31	1.48	0.96
Q9P2J5	LARS	LARS Leucine--tRNA ligase, cytoplasmic	cytoplasm/lysosome/nucleus	aminoacyl-tRNA synthetase(PC00142)	1.165	1.57	1.165	1.57	1.11	0.86
P07900	HSP90AA1	HSP90AA1 Heat shock protein HSP 90-alpha	cytoplasm/endoplasmic reticulum/membrane/nucleus/cell membrane/endosome/golgi/secreted/cytoskeleton/mitochondrion	Hsp90 family chaperone(PC00072)	1.16	1.435	1.155	1.505	1.4	1.03
P13010	XRCC5	XRCC5 X-ray repair cross-complementing protein 5	cytoplasm/nucleus/cell membrane/membrane/endosome/golgi/mitochondrion/cytoskeleton	DNA helicase(PC00171)	1.16	1.21	1.16	1.21	1.66	1.4
P78527	PRKDC	PRKDC DNA-dependent protein kinase catalytic subunit	cytoplasm/nucleus/secreted/cell membrane/membrane/cytoplasmic vesicle	non-receptor serine/threonine protein kinase(PC00220);nucleotide kinase(PC00137)	1.16	1.155	1.16	1.155	1.02	0.95
Q7Z406	MYH14	MYH14 Myosin-14	no annotated location	G-protein modulator(PC00095);actin binding motor protein(PC00022);cell junction protein(PC00085)	1.16	1.48	1.17	1.665	1.38	0.82
P30101	PDIA3	PDIA3 Protein disulfide-isomerase A3	membrane/cytoplasm/endosome/endoplasmic reticulum/golgi/lysosome/nucleus/cytoplasmic vesicle/mitochondrion/secreted/cell membrane/cytoskeleton	no_panther_category	1.155	2.235	1.155	2.235	1.86	1.38
P62937	PPIA	PPIA Peptidyl-prolyl cis-trans isomerase A	cytoplasm/cell membrane/membrane/endoplasmic reticulum/mitochondrion/nucleus/secreted/cytoplasmic vesicle/endosome/golgi	isomerase(PC00135)	1.155	1.635	1.17	1.68	1.49	1.1
P00505	GOT2	GOT2 Aspartate aminotransferase, mitochondrial	cell membrane/membrane/mitochondrion	no_panther_category	1.15	1.095	1.15	1.095	1	0.86
P50570	DNM2	DNM2 Dynamin-2	cytoplasm/cytoskeleton/cell membrane/membrane/cytoplasmic vesicle/endosome/golgi/nucleus	hydrolase(PC00121);microtubule family cytoskeletal protein(PC00085);small GTPase(PC00157)	1.15	1.205	1.155	1.355	1.08	0.76
Q08211	DHX9	DHX9 ATP-dependent RNA helicase A	cytoplasm/nucleus/secreted	RNA helicase(PC00171)	1.15	1.325	1.15	1.325	1.35	1.05
P61158	ACTR3	ACTR3 Actin-related protein 3	cytoplasm/cytoskeleton/nucleus	actin and actin related protein(PC00085)	1.145	1.56	1.165	1.56	1.27	1.18
Q9Y4L1	HYOU1	HYOU1 Hypoxia up-regulated protein 1	endoplasmic reticulum	no_panther_category	1.145	0.99	1.145	0.99	1.4	0.84
Q86VP6	CAND1	CAND1 Cullin-associated NEDD8-dissociated protein 1	cytoplasm/nucleus/golgi	transcription factor(PC00218)	1.14	1.525	1.14	1.525	1.36	1.15
Q96QK1	VPS35	VPS35 Vacuolar protein sorting-associated protein 35	membrane/cytoplasm/endosome/golgi	membrane traffic protein(PC00150)	1.135	1.64	1.135	1.64	1.3	1.02
P0CG38	POTEI	POTEI POTE ankyrin domain family member I	no annotated location	no_panther_category	1.13	1.635	0	0	1.31	1.15
P17987	TCP1	TCP1 T-complex protein 1 subunit alpha	nucleus/cell membrane/membrane/secreted/cytoplasm/cytoskeleton	chaperonin(PC00072)	1.13	1.65	1.13	1.65	1.2	0
P21333	FLNA	FLNA Filamin-A	secreted/cell membrane/membrane/cytoplasm/cytoskeleton/nucleus/endosome/golgi/cytoplasmic vesicle/endoplasmic reticulum/mitochondrion	non-motor actin binding protein(PC00085)	1.13	1.39	1.12	1.405	1.29	1.12
P49368	CCT3	CCT3 T-complex protein 1 subunit gamma	cell membrane/membrane/cytoplasm/mitochondrion/nucleus	chaperonin(PC00072)	1.13	1.855	1.13	1.855	1.48	0.64
P62736	ACTA2	ACTA2 Actin, aortic smooth muscle	cytoplasm/cytoskeleton	actin and actin related protein(PC00085)	1.13	1.585	0	0	1.34	1.03
P46940	IQGAP1	IQGAP1 Ras GTPase-activating-like protein IQGAP1	cytoplasm/nucleus/membrane/cytoskeleton/cell membrane/endosome/endoplasmic reticulum/golgi/secreted/mitochondrion	G-protein modulator(PC00095)	1.125	1.61	1.125	1.62	1.23	1.08
P47897	QARS	QARS Glutamine--tRNA ligase	nucleus/cytoplasm/cytoskeleton/cell membrane/membrane/endosome	ligase(PC00142)	1.125	1.41	1.125	1.41	1.39	1.04
P68133	ACTA1	ACTA1 Actin, alpha skeletal muscle	cytoplasm/cytoskeleton	actin and actin related protein(PC00085)	1.125	1.585	0	0	1.34	1.03
O43707	ACTN4	ACTN4 Alpha-actinin-4	cytoplasm/nucleus/cell membrane/membrane/cytoskeleton	non-motor actin binding protein(PC00085)	1.12	1.375	1.105	1.34	1.39	1.2
P13804	ETFA	ETFA Electron transfer flavoprotein subunit alpha, mito	mitochondrion	dehydrogenase(PC00176);oxidase(PC00092);transferase(PC00175)	1.12	2.155	1.12	2.155	1.36	1.17
P22234	PAICS	PAICS Multifunctional protein ADE2	cytoplasm/nucleus	ligase(PC00142)	1.12	1.92	1.12	1.92	1.5	1.18
P55072	VCP	VCP Transitional endoplasmic reticulum ATPase	cytoplasm/membrane/endoplasmic reticulum/golgi/nucleus/endosome/cell membrane/cytoskeleton	no_panther_category	1.12	1.205	1.12	1.205	1.23	0.87
Q6XQN6	NAPRT1	NAPRT1 Nicotinate phosphoribosyltransferase	cytoplasm/nucleus	glycosyltransferase(PC00220)	1.12	2.395	1.12	2.395	1.31	1.22
P14625	HSP90B1	HSP90B1 Endoplasmin	endoplasmic reticulum/cytoplasm/nucleus	Hsp90 family chaperone(PC00072)	1.115	1.36	1.115	1.36	1.33	1.02
P53618	COPB1	COPB1 Coatomer subunit beta	cell membrane/membrane/cytoplasm/cytoplasmic vesicle/endoplasmic reticulum/golgi/nucleus/endosome	vesicle coat protein(PC00150)	1.115	1.495	1.115	1.495	1.26	1.02
Q14315	FLNC	FLNC Filamin-C	membrane/cytoplasm/cytoskeleton/mitochondrion/nucleus/cell membrane/lysosome/cytoplasmic vesicle/endosome/golgi	non-motor actin binding protein(PC00085)	1.115	1.275	0	0	1.13	1.07
Q8IZ83	ALDH16A1	ALDH16A1 Aldehyde dehydrogenase family 16 member A1	no annotated location	dehydrogenase(PC00176)	1.115	1.815	1.115	1.815	1.36	1.12
O75369	FLNB	FLNB Filamin-B	cytoplasm/cytoskeleton/endosome/golgi/nucleus/secreted/endoplasmic reticulum/cell membrane/membrane	non-motor actin binding protein(PC00085)	1.11	1.38	1.14	1.445	1.32	1.13
P31949	S100A11	S100A11 Protein S100-A11	cytoplasm/nucleus	calmodulin(PC00060);signaling molecule(PC00131)	1.11	1.14	1.11	1.14	1.13	1.12
P68431	HIST1H3J	HIST1H3J Histone H3.1	cytoplasm/nucleus/cytoskeleton	NA	1.11	1.83	0	0	1.31	1.36
Q5TEC6	HIST2H3PS2	HIST2H3PS2 Histone H3	nucleus	histone(PC00171)	1.11	1.83	0	0	1.31	1.36
P60709	ACTB	ACTB Actin, cytoplasmic 1	cytoplasm/cytoskeleton/membrane/nucleus/cell membrane	actin and actin related protein(PC00085)	1.105	1.52	1.11	1.54	1.35	1.02
P26641	EEF1G	EEF1G Elongation factor 1-gamma	nucleus/cell membrane/membrane/cytoplasm	cytoskeletal protein(PC00085);epimerase/racemase(PC00135);reductase(PC00096);signaling molecule(PC00176);transferase(PC00198);translation elongation factor(PC00207)	1.1	1.6	1.01	1.545	1.33	1
Q00610	CLTC	CLTC Clathrin heavy chain 1	cell membrane/membrane/cytoplasm/cytoplasmic vesicle/endosome/nucleus/golgi	vesicle coat protein(PC00150)	1.1	1.31	1.145	1.335	1.3	1.05
Q29RF7	PDS5A	PDS5A Sister chromatid cohesion protein PDS5 homolog A	cytoplasm/nucleus	chromatin/chromatin-binding protein(PC00171)	1.1	1.48	0	0	2.11	0.81
Q10567	AP1B1	AP1B1 AP-1 complex subunit beta-1	membrane/cytoplasm/cytoplasmic vesicle/golgi	membrane traffic protein(PC00150)	1.095	1.64	1.13	1.495	0	1.08
Q9NSE4	IARS2	IARS2 Isoleucine--tRNA ligase, mitochondrial	mitochondrion	aminoacyl-tRNA synthetase(PC00142)	1.095	1.09	1.095	1.09	1.16	0.95
P40926	MDH2	MDH2 Malate dehydrogenase, mitochondrial	mitochondrion	dehydrogenase(PC00176)	1.09	1.045	1.09	1.045	1.32	0.96
P55060	CSE1L	CSE1L Exportin-2	cytoplasm/endoplasmic reticulum/mitochondrion/nucleus	small GTPase(PC00095);transporter(PC00020)	1.09	1.595	1.09	1.595	1.34	1.04
Q12931	TRAP1	TRAP1 Heat shock protein 75 kDa, mitochondrial	membrane/mitochondrion	Hsp90 family chaperone(PC00072)	1.09	1.29	1.09	1.29	0	1.12
Q6P2Q9	PRPF8	PRPF8 Pre-mRNA-processing-splicing factor 8	cytoplasm/nucleus/cytoskeleton/cytoplasmic vesicle	mRNA splicing factor(PC00171)	1.09	1.035	1.09	1.035	1.7	0.96
P00390	GSR	GSR Glutathione reductase, mitochondrial	cytoplasm/mitochondrion	dehydrogenase(PC00176);oxidase(PC00092);reductase(PC00175)	1.085	2.24	1.085	2.24	1.33	0
Q9BQA1	WDR77	WDR77 Methylosome protein 50	cytoplasm/golgi/nucleus	receptor(PC00197)	1.085	1.92	1.085	1.92	0	1.29
O43143	DHX15	DHX15 Putative pre-mRNA-splicing factor ATP-dependent RN	nucleus	RNA helicase(PC00171)	1.075	1.875	1.075	1.875	1.37	0
P49327	FASN	FASN Fatty acid synthase	cytoplasm/cell membrane/membrane/endoplasmic reticulum/mitochondrion/nucleus/secreted	acyltransferase(PC00220);dehydrogenase(PC00042);esterase(PC00176);methyltransferase(PC00092)	1.075	1.85	1.075	1.85	1.41	1.09
P15880	RPS2	RPS2 40S ribosomal protein S2	membrane/cytoplasm/cytoplasmic vesicle/endosome/endoplasmic reticulum/golgi/lysosome/mitochondrion	ribosomal protein(PC00171)	1.07	1.505	1.07	1.505	1.26	1.22
Q14974	KPNB1	KPNB1 Importin subunit beta-1	cell membrane/membrane/cytoplasm/nucleus/endoplasmic reticulum/mitochondrion/secreted	transfer/carrier protein(PC00219);transporter(PC00227)	1.07	1.545	1.07	1.545	1.42	1
O14744	PRMT5	PRMT5 Protein arginine N-methyltransferase 5	cytoplasm/golgi/nucleus/cytoskeleton/cell membrane/membrane/cytoplasmic vesicle	signaling molecule(PC00207)	1.065	2.11	1.065	2.11	1.28	1.03
P15311	EZR	EZR Ezrin	cell membrane/membrane/cytoplasm/cytoskeleton/cytoplasmic vesicle/golgi/nucleus	actin family cytoskeletal protein(PC00085)	1.065	1.315	0	0	0	1.55
P49411	TUFM	TUFM Elongation factor Tu, mitochondrial	membrane/cytoplasm/endoplasmic reticulum/mitochondrion/nucleus	G-protein(PC00095);hydrolase(PC00020);translation elongation factor(PC00121);translation initiation factor(PC00171)	1.065	1.725	1.065	1.725	1.34	1.02
Q16881	TXNRD1	TXNRD1 Thioredoxin reductase 1, cytoplasmic	cell membrane/membrane/golgi/nucleus/cytoplasm	dehydrogenase(PC00176);oxidase(PC00092);reductase(PC00175)	1.065	1.375	1.04	1.56	1.4	2.29
Q92499	DDX1	DDX1 ATP-dependent RNA helicase DDX1	cytoplasm/nucleus	RNA helicase(PC00171)	1.065	1.14	1.065	1.14	0	0.89
P29401	TKT	TKT Transketolase	cytoplasm/cytoskeleton/nucleus	dehydrogenase(PC00176);lyase(PC00092);transketolase(PC00144)	1.06	1.175	1.06	1.175	1.23	0.91
P30041	PRDX6	PRDX6 Peroxiredoxin-6	cytoplasm/mitochondrion/nucleus/membrane/endoplasmic reticulum/secreted/cytoplasmic vesicle/lysosome/cytoskeleton	peroxidase(PC00176)	1.06	1.74	1.06	1.74	1.34	1.34
P30153	PPP2R1A	PPP2R1A Serine/threonine-protein phosphatase 2A 65 kDa reg	nucleus/cytoplasm/membrane/cytoskeleton/mitochondrion/cell membrane/endoplasmic reticulum	protein phosphatase(PC00121)	1.06	1.585	1.13	1.64	1.19	1.12
P34897	SHMT2	SHMT2 Serine hydroxymethyltransferase, mitochondrial	membrane/cytoplasm/endoplasmic reticulum/mitochondrion/nucleus	methyltransferase(PC00220)	1.06	1.105	0	0	1.29	0.81
P41252	IARS	IARS Isoleucine--tRNA ligase, cytoplasmic	cytoplasm	aminoacyl-tRNA synthetase(PC00142)	1.06	1.11	1.06	1.11	1.11	1.11
P62312	LSM6	LSM6 U6 snRNA-associated Sm-like protein LSm6	cytoplasm/cytoskeleton/nucleus/cell membrane/membrane/endoplasmic reticulum/secreted	mRNA splicing factor(PC00171)	1.055	0.835	1.055	0.835	1.14	0.66
Q7Z6Z7	HUWE1	HUWE1 E3 ubiquitin-protein ligase HUWE1	mitochondrion/nucleus/cytoplasm/cytoskeleton/endoplasmic reticulum	ubiquitin-protein ligase(PC00142)	1.055	2.135	1.055	2.135	1.83	1.01
P41250	GARS	GARS Glycine--tRNA ligase	cytoplasm/mitochondrion	aminoacyl-tRNA synthetase(PC00142)	1.05	1.48	1.05	1.48	1.23	1.17
O60701	UGDH	UGDH UDP-glucose 6-dehydrogenase	no annotated location	dehydrogenase(PC00176)	1.045	1.505	1.045	1.505	1.4	1.05
O75643	SNRNP200	SNRNP200 U5 small nuclear ribonucleoprotein 200 kDa helicas	membrane/cytoplasm/endosome/nucleus	no_panther_category	1.045	1.34	1.045	1.34	1.4	1.06
O14980	XPO1	XPO1 Exportin-1	cytoplasm/cytoskeleton/nucleus/cell membrane/membrane/mitochondrion/endoplasmic reticulum/secreted	receptor(PC00197)	1.035	1.51	1.035	1.51	1.15	0.91
P04406	GAPDH	GAPDH Glyceraldehyde-3-phosphate dehydrogenase	cell membrane/membrane/cytoplasm/endosome/nucleus/endoplasmic reticulum/golgi/secreted/cytoskeleton	dehydrogenase(PC00176)	1.035	1.655	1.035	1.655	1.36	1.11
P48735	IDH2	IDH2 Isocitrate dehydrogenase	mitochondrion	no_panther_category	1.035	1.355	1.055	1.4	1.15	0.93
O00410	IPO5	IPO5 Importin-5	nucleus/membrane/cytoplasm/cytoskeleton/cytoplasmic vesicle/golgi/endoplasmic reticulum/cell membrane/mitochondrion/secreted	G-protein modulator(PC00095);transfer/carrier protein(PC00022);transporter(PC00219)	1.03	1.83	1.03	1.83	1.34	0.88
P11586	MTHFD1	MTHFD1 C-1-tetrahydrofolate synthase, cytoplasmic	cytoplasm/cell membrane/membrane/endoplasmic reticulum/mitochondrion/nucleus/secreted	ligase(PC00142)	1.03	1.53	1.03	1.52	1.11	0.95
P28838	LAP3	LAP3 Cytosol aminopeptidase	cytoplasm	no_panther_category	1.03	1.355	1.03	1.355	1.07	1.21
Q13838	DDX39B	DDX39B Spliceosome RNA helicase DDX39B	nucleus/cytoplasm	RNA helicase(PC00171)	1.03	1.225	1.135	4.33	1.29	0.87
P60981	DSTN	DSTN Destrin	cytoplasm/cytoskeleton	non-motor actin binding protein(PC00085)	1.02	2.035	1.02	2.035	1.4	1.07
Q92973	TNPO1	TNPO1 Transportin-1	cytoplasm/endosome/golgi/nucleus	transfer/carrier protein(PC00219);transporter(PC00227)	1.02	1.325	0.985	1.285	1.12	1.18
P63104	YWHAZ	YWHAZ 14-3-3 protein zeta/delta	cytoplasm/membrane/cytoskeleton/mitochondrion/nucleus/secreted/golgi/cytoplasmic vesicle/cell membrane/endosome/endoplasmic reticulum/lysosome	chaperone(PC00072)	1.015	1.5	0	0	1.26	0.94
P19367	HK1	HK1 Hexokinase-1	membrane/mitochondrion/cell membrane	no_panther_category	1.005	1.23	1.025	1.23	1.17	0.83
P80404	ABAT	ABAT 4-aminobutyrate aminotransferase, mitochondrial	mitochondrion	transaminase(PC00220)	1.005	1.205	1.005	1.205	0	0.86
P00492	HPRT1	HPRT1 Hypoxanthine-guanine phosphoribosyltransferase	cytoplasm/mitochondrion/nucleus/cell membrane/membrane/cytoskeleton/endoplasmic reticulum/secreted	glycosyltransferase(PC00220);mutase(PC00111)	0.995	1.87	0.995	1.87	1.41	1.03
Q15185	PTGES3	PTGES3 Prostaglandin E synthase 3	cytoplasm/nucleus/cell membrane/membrane	chaperone(PC00072)	0.99	1.175	0.99	1.175	1.39	1.06
Q99873	PRMT1	PRMT1 Protein arginine N-methyltransferase 1	cytoplasm/nucleus/cell membrane/membrane/endosome/endoplasmic reticulum	methyltransferase(PC00220)	0.99	1.795	0.99	1.795	1.31	1.47
O95352	ATG7	ATG7 Ubiquitin-like modifier-activating enzyme ATG7	cytoplasm/nucleus/membrane/cytoskeleton/cytoplasmic vesicle/golgi/endoplasmic reticulum	ligase(PC00142);transfer/carrier protein(PC00219)	0.98	1.98	0.98	1.98	1.33	1.04
P00367	GLUD1	GLUD1 Glutamate dehydrogenase 1, mitochondrial	mitochondrion	dehydrogenase(PC00176)	0.98	1.085	0	0	1.12	0
P42224	STAT1	STAT1 Signal transducer and activator of transcription 1	cytoplasm/nucleus/membrane/cytoskeleton/cell membrane/endosome/endoplasmic reticulum/golgi/secreted/lysosome/mitochondrion/peroxisome	nucleic acid binding(PC00171);transcription factor(PC00218)	0.98	1.855	0.98	1.855	1.64	1.33
Q15149	PLEC	PLEC Plectin	nucleus/cell membrane/membrane/cytoplasm/cytoskeleton	non-motor actin binding protein(PC00085)	0.98	1.425	0.96	1.415	1.36	1.01
Q9UBT2	UBA2	UBA2 SUMO-activating enzyme subunit 2	nucleus/cytoplasm/cell membrane/membrane	ligase(PC00142);transfer/carrier protein(PC00219)	0.98	2.125	0.98	2.125	1.39	1.27
Q27J81	INF2	INF2 Inverted formin-2	cytoplasm	non-motor actin binding protein(PC00085)	0.975	1.825	0.975	1.825	0	1.07
E9PPU0	EPPK1	EPPK1 Epiplakin	cytoplasm/cytoskeleton	non-motor actin binding protein(PC00085)	0.97	1.335	1.03	1.195	1.36	0.98
O60502	MGEA5	MGEA5 Bifunctional protein NCOAT	cytoplasm/nucleus	no_panther_category	0.97	2.025	0.97	2.025	1.59	0
Q06830	PRDX1	PRDX1 Peroxiredoxin-1	cytoplasm/nucleus/secreted/cytoskeleton	peroxidase(PC00176)	0.97	2.09	0.97	2.12	1.21	1.18
P13639	EEF2	EEF2 Elongation factor 2	cell membrane/membrane/cytoplasm/endosome/nucleus	G-protein(PC00095);hydrolase(PC00020);translation elongation factor(PC00121);translation initiation factor(PC00171)	0.96	1.885	0.96	1.885	1.47	1.09
P25205	MCM3	MCM3 DNA replication licensing factor MCM3	nucleus	DNA helicase(PC00171);hydrolase(PC00009)	0.96	1.835	0.96	1.835	1.28	1.45
O00764	PDXK	PDXK Pyridoxal kinase	cytoplasm	kinase(PC00220)	0.955	1.955	0.955	1.955	1.6	1.12
P54886	ALDH18A1	ALDH18A1 Delta-1-pyrroline-5-carboxylate synthase	membrane/cytoplasm/cytoplasmic vesicle/endoplasmic reticulum/golgi/mitochondrion	amino acid kinase(PC00220);dehydrogenase(PC00137)	0.94	1.725	0.94	1.725	1.14	0.95
O75083	WDR1	WDR1 WD repeat-containing protein 1	cytoplasm/cytoskeleton	non-motor actin binding protein(PC00085)	0.935	1.64	0.935	1.64	1.64	1.01
P13489	RNH1	RNH1 Ribonuclease inhibitor	cytoplasm/cytoplasmic vesicle/nucleus/secreted/cell membrane/membrane/cytoskeleton/endoplasmic reticulum	nucleic acid binding(PC00171);transcription cofactor(PC00218)	0.935	1.59	0.935	1.59	1.27	0.9
Q9P258	RCC2	RCC2 Protein RCC2	cytoplasm/cytoskeleton/nucleus	chromatin/chromatin-binding protein(PC00171);guanyl-nucleotide exchange factor(PC00009)	0.935	1.545	0.935	1.545	1.29	0.84
Q92598	HSPH1	HSPH1 Heat shock protein 105 kDa	cytoplasm/cytoplasmic vesicle/nucleus	no_panther_category	0.925	1.84	0.865	1.915	1.34	1.02
Q13263	TRIM28	TRIM28 Transcription intermediary factor 1-beta	nucleus/cell membrane/membrane/cytoplasm	transcription cofactor(PC00218);ubiquitin-protein ligase(PC00217)	0.92	1.5	0.92	1.5	1.4	0.96
P13667	PDIA4	PDIA4 Protein disulfide-isomerase A4	endoplasmic reticulum	no_panther_category	0.915	1.365	0.915	1.365	1.49	1.22
Q96FW1	OTUB1	OTUB1 Ubiquitin thioesterase OTUB1	cytoplasm/nucleus/endoplasmic reticulum/mitochondrion/cell membrane/membrane/endosome/secreted	hydrolase(PC00121)	0.915	1.57	0.915	1.57	0	1.7
Q9Y265	RUVBL1	RUVBL1 RuvB-like 1	cytoplasm/nucleus/cytoskeleton/cell membrane/membrane	no_panther_category	0.905	1.495	0.905	1.495	1.3	1.17
Q7L576	CYFIP1	CYFIP1 Cytoplasmic FMR1-interacting protein 1	membrane/cytoplasm/cell membrane/nucleus	G-protein modulator(PC00095)	0.9	1.84	1.015	1.805	1.14	1.08
O00148	DDX39A	DDX39A ATP-dependent RNA helicase DDX39A	cytoplasm/nucleus/cytoskeleton	RNA helicase(PC00171)	0.895	1.35	0	0	1.08	0.87
Q04760	GLO1	GLO1 Lactoylglutathione lyase	no annotated location	no_panther_category	0.895	1.825	0.895	1.825	1.24	0.89
Q15393	SF3B3	SF3B3 Splicing factor 3B subunit 3	nucleus	damaged DNA-binding protein(PC00171);mRNA polyadenylation factor(PC00009);mRNA splicing factor(PC00086)	0.89	1.685	0.89	1.685	1.11	1
Q9ULA0	DNPEP	DNPEP Aspartyl aminopeptidase	cytoplasm/membrane	no_panther_category	0.89	2.295	0.89	2.295	1.28	1.14
O15327	INPP4B	INPP4B Type II inositol 3,4-bisphosphate 4-phosphatase	no annotated location	no_panther_category	0.885	2.235	0.885	2.235	1.39	1.1
Q99714	HSD17B10	HSD17B10 3-hydroxyacyl-CoA dehydrogenase type-2	membrane/cytoplasm/endosome/endoplasmic reticulum/golgi/lysosome/nucleus/mitochondrion	dehydrogenase(PC00176);reductase(PC00092)	0.87	1.735	0.87	1.735	1.05	0.94
P08559	PDHA1	PDHA1 Pyruvate dehydrogenase E1 component subunit alpha,	mitochondrion	dehydrogenase(PC00176)	0.865	1.89	0	0	0	0
P30044	PRDX5	PRDX5 Peroxiredoxin-5, mitochondrial	cytoplasm/mitochondrion/peroxisome	no_panther_category	0.865	2.325	0.865	2.325	1.68	1.27
Q05639	EEF1A2	EEF1A2 Elongation factor 1-alpha 2	cytoplasm/nucleus	G-protein(PC00095);hydrolase(PC00020);translation elongation factor(PC00121);translation initiation factor(PC00171)	0.86	2.005	1.035	2.18	1.4	1.02
Q16822	PCK2	PCK2 Phosphoenolpyruvate carboxykinase	mitochondrion/membrane/cytoplasm/nucleus	decarboxylase(PC00144)	0.855	1.355	0.865	1.35	1.02	0.85
P30154	PPP2R1B	PPP2R1B Serine/threonine-protein phosphatase 2A 65 kDa reg	cytoplasm/nucleus/cytoskeleton/cell membrane/membrane	protein phosphatase(PC00121)	0.845	1.34	0	0	0	0.72
Q15366	PCBP2	PCBP2 Poly(rC)-binding protein 2	cytoplasm/nucleus	enzyme modulator(PC00095);mRNA splicing factor(PC00171);ribonucleoprotein(PC00031)	0.825	2.675	0	0	1.54	1.25
Q53H96	PYCRL	PYCRL Pyrroline-5-carboxylate reductase 3	cytoplasm/cell membrane/membrane/cytoskeleton/endoplasmic reticulum/nucleus/secreted	no_panther_category	0.825	1.84	0.825	1.84	1.33	0
P53597	SUCLG1	SUCLG1 Succinyl-CoA ligase	mitochondrion	no_panther_category	0.815	1.73	0.815	1.73	1.23	1.01
P52209	PGD	PGD 6-phosphogluconate dehydrogenase, decarboxylating	cytoplasm	dehydrogenase(PC00176)	0.805	1.55	0.805	1.55	0.99	0.83
Q3LXA3	DAK	DAK Bifunctional ATP-dependent dihydroxyacetone kinase	cell membrane/membrane/cytoplasm/cytoskeleton/endoplasmic reticulum/nucleus/secreted	no_panther_category	0.8	1.615	0.8	1.615	0	0.97
O15143	ARPC1B	ARPC1B Actin-related protein 2/3 complex subunit 1B	cytoplasm/cytoskeleton	actin family cytoskeletal protein(PC00085)	0.79	1.38	0	0	1.23	0
P63151	PPP2R2A	PPP2R2A Serine/threonine-protein phosphatase 2A 55 kDa reg	cytoplasm	protein phosphatase(PC00121)	0.79	2.67	0	0	0	0.95
P09622	DLD	DLD Dihydrolipoyl dehydrogenase, mitochondrial	mitochondrion	dehydrogenase(PC00176);oxidase(PC00092);reductase(PC00175)	0.775	2.08	0.775	2.08	1.15	0.88
Q9HCC0	MCCC2	MCCC2 Methylcrotonoyl-CoA carboxylase beta chain, mitoch	mitochondrion	ligase(PC00142)	0.775	1.605	0.775	1.605	1.06	0.86
O95994	AGR2	AGR2 Anterior gradient protein 2 homolog	endoplasmic reticulum/secreted/membrane/cytoplasm/nucleus/cell membrane/cytoplasmic vesicle	reductase(PC00176);surfactant(PC00198)	0.765	0.97	0.765	0.97	1.12	0.81
P53396	ACLY	ACLY ATP-citrate synthase	cytoplasm	ligase(PC00142);lyase(PC00144);transferase(PC00220)	0.765	1.65	0.765	1.65	1.1	0.94
P52597	HNRNPF	HNRNPF Heterogeneous nuclear ribonucleoprotein F	cytoplasm/nucleus	ribosomal protein(PC00171)	0.755	1.765	0	0	1.03	1.25
P68104	EEF1A1	EEF1A1 Elongation factor 1-alpha 1	cytoplasm/membrane/cytoskeleton/nucleus/cell membrane/cytoplasmic vesicle/golgi	G-protein(PC00095);hydrolase(PC00020);translation elongation factor(PC00121);translation initiation factor(PC00171)	0.755	1.925	0.78	2.35	1.17	1
Q15365	PCBP1	PCBP1 Poly(rC)-binding protein 1	cytoplasm/nucleus	enzyme modulator(PC00095);mRNA splicing factor(PC00171);ribonucleoprotein(PC00031)	0.74	3.065	0.74	3.065	1.32	1.16
Q14980	NUMA1	NUMA1 Nuclear mitotic apparatus protein 1	cell membrane/membrane/cytoplasm/cytoskeleton/nucleus	no_panther_category	0.73	2.18	0.73	2.18	0	0.93
O43252	PAPSS1	PAPSS1 Bifunctional 3-phosphoadenosine 5-phosphosulfate	no annotated location	kinase(PC00220);nucleotidyltransferase(PC00137)	0.725	1.795	0.89	1.87	0.95	0.82
P11413	G6PD	G6PD Glucose-6-phosphate 1-dehydrogenase	cytoplasm/cytoskeleton/nucleus/membrane	dehydrogenase(PC00176)	0.72	1.465	0.72	1.465	1	0.83
Q14258	TRIM25	TRIM25 E3 ubiquitin/ISG15 ligase TRIM25	membrane/cytoplasm/cytoskeleton/nucleus	no_panther_category	0.705	1.42	0.705	1.42	0.86	0
Q9Y365	STARD10	STARD10 PCTP-like protein	nucleus/membrane/cytoplasm	no_panther_category	0.7	1.655	0.7	1.655	0.88	0.71
P49721	PSMB2	PSMB2 Proteasome subunit beta type-2	cytoplasm/nucleus	no_panther_category	0.695	1.14	0.695	1.14	1.02	0
Q01813	PFKP	PFKP 6-phosphofructokinase type C	cytoplasm	carbohydrate kinase(PC00220)	0.69	2.28	0.795	1.58	1.19	0.95
O95340	PAPSS2	PAPSS2 Bifunctional 3-phosphoadenosine 5-phosphosulfate	no annotated location	kinase(PC00220);nucleotidyltransferase(PC00137)	0.685	1.745	0.685	2.08	1.08	0.85
P07858	CTSB	CTSB Cathepsin B	secreted/lysosome/nucleus/cell membrane/membrane/cytoplasm	cysteine protease(PC00121)	0.685	1.475	0.685	1.475	0.99	0.88
P10809	HSPD1	HSPD1 60 kDa heat shock protein, mitochondrial	cytoplasm/nucleus/cytoskeleton/mitochondrion/secreted/cell membrane/membrane/golgi	chaperonin(PC00072)	0.685	1.535	0.685	1.535	1	0.8
P15559	NQO1	NQO1 NAD(P)H dehydrogenase	nucleus/cytoplasm	no_panther_category	0.68	1.565	0.68	1.565	1.03	10.7
P51858	HDGF	HDGF Hepatoma-derived growth factor	cytoplasm/nucleus	growth factor(PC00207);transcription cofactor(PC00112)	0.675	2.42	0	0	1.33	0
P33176	KIF5B	KIF5B Kinesin-1 heavy chain	membrane/cytoplasm/cytoskeleton	microtubule binding motor protein(PC00085)	0.66	1.82	0.66	1.82	1.02	0.91
Q8NDH3	NPEPL1	NPEPL1 Probable aminopeptidase NPEPL1	nucleus	no_panther_category	0.66	1.96	0.66	1.96	1.1	0.95
Q8NBS9	TXNDC5	TXNDC5 Thioredoxin domain-containing protein 5	cytoplasm/secreted/endoplasmic reticulum	no_panther_category	0.65	1.395	0.65	1.395	1	0
P30084	ECHS1	ECHS1 Enoyl-CoA hydratase, mitochondrial	mitochondrion/membrane/cytoplasm/cytoplasmic vesicle/endosome/endoplasmic reticulum/golgi/lysosome/nucleus	acetyltransferase(PC00220);acyltransferase(PC00038);dehydrogenase(PC00042);epimerase/racemase(PC00176);hydratase(PC00092);ligase(PC00135)	0.645	1.805	0.645	1.805	1.12	0.88
Q06323	PSME1	PSME1 Proteasome activator complex subunit 1	no annotated location	no_panther_category	0.645	2.395	0.645	2.395	1.3	1.06
Q99798	ACO2	ACO2 Aconitate hydratase, mitochondrial	mitochondrion	dehydratase(PC00144);hydratase(PC00091)	0.64	2.14	0.64	2.14	0.85	0.83
P50897	PPT1	PPT1 Palmitoyl-protein thioesterase 1	lysosome	esterase(PC00121)	0.62	1.705	0.62	1.705	1	0.72
Q9H845	ACAD9	ACAD9 Acyl-CoA dehydrogenase family member 9, mitochondr	mitochondrion	dehydrogenase(PC00176);oxidase(PC00092);transferase(PC00175)	0.62	1.115	0.62	1.115	0	1.11
P40763	STAT3	STAT3 Signal transducer and activator of transcription 3	mitochondrion/cytoplasm/golgi/cell membrane/membrane/cytoskeleton/cytoplasmic vesicle/secreted/nucleus/peroxisome/endosome/endoplasmic reticulum	nucleic acid binding(PC00171);transcription factor(PC00218)	0.6	1.82	0.6	1.82	0	1.05
Q9UL46	PSME2	PSME2 Proteasome activator complex subunit 2	no annotated location	no_panther_category	0.595	2.82	0.595	2.82	1.44	1.31
Q8TCU6	PREX1	PREX1 Phosphatidylinositol 3,4,5-trisphosphate-dependent	cell membrane/membrane/cytoplasm/nucleus/endoplasmic reticulum/golgi/lysosome/mitochondrion	guanyl-nucleotide exchange factor(PC00095)	0.57	1.3	0.57	1.3	1.18	0.74
P17858	PFKL	PFKL 6-phosphofructokinase, liver type	mitochondrion/cytoplasm	carbohydrate kinase(PC00220)	0.275	7.14	0.35	7.025	1.12	1
P08237	PFKM	PFKM 6-phosphofructokinase, muscle type	cytoplasm/nucleus	carbohydrate kinase(PC00220)	0.25	6.57	0	0	0.88	0.88

## Sheet: met_enriched
					SILAC ratios
ID	Protein	Description	subcelluar_location	Panther_category	all_for_avg	all_rev_avg	unique_for_avg	unique_rev_avg	met_o_control	met_control
P08107	HSPA1B	HSPA1B Heat shock 70 kDa protein 1A/1B	cytoplasm	no_panther_category	13.275	0.185	12.535	0.185	1.28	1.16
P11142	HSPA8	HSPA8 Heat shock cognate 71 kDa protein	cytoplasm/cytoskeleton/nucleus/cell membrane/membrane/cytoplasmic vesicle/lysosome/endosome/endoplasmic reticulum/golgi/secreted/mitochondrion	no_panther_category	8.645	0.25	10.36	0.24	1.37	1.22
P52272	HNRNPM	HNRNPM Heterogeneous nuclear ribonucleoprotein M	cytoplasm/cytoskeleton/golgi/nucleus	ribonucleoprotein(PC00171)	2.315	0.37	2.315	0.37	0.91	0.68
P54652	HSPA2	HSPA2 Heat shock-related 70 kDa protein 2	cytoplasm/cytoskeleton	no_panther_category	4.66	0.325	0	0	1.42	1.22
Q5JRX3	PITRM1	PITRM1 Presequence protease, mitochondrial	mitochondrion	metalloprotease(PC00121)	2.425	0.46	2.425	0.46	1.05	0.84

## Sheet: met_o_enriched
					SILAC ratios
ID	Protein	Description	subcelluar_location	Panther_category	all_for_avg	all_rev_avg	unique_for_avg	unique_rev_avg	met_o_control	met_control
P08237	PFKM	PFKM 6-phosphofructokinase, muscle type	cytoplasm/nucleus	carbohydrate kinase(PC00220)	0.25	6.57	0	0	0.88	0.88
P17858	PFKL	PFKL 6-phosphofructokinase, liver type	mitochondrion/cytoplasm	carbohydrate kinase(PC00220)	0.275	7.14	0.35	7.025	1.12	1
